# Supplementary material for: Nucleolar release of rDNA repeats for repair involves SUMO-mediated untethering by the Cdc48/p97 segregase
Source: PubMed Central journal article supplement (PMC8363623; doi:10.1038/s41467-021-25205-2), 2021-08-13
Supplement: 41467_2021_25205_MOESM3_ESM.pdf [file 41467_2021_25205_MOESM3_ESM.pdf]

## Reporting Summary

Nature Research wishes to improve the reproducibility of the work that we publish. This form provides structure for consistency and transparency in reporting. For further information on Nature Research policies, see our [Editorial Policies](#) and the [Editorial Policy Checklist](#).

### Statistics

For all statistical analyses, confirm that the following items are present in the figure legend, table legend, main text, or Methods section.

n/a Confirmed

- |                                     |                                     |                                                                                                                                                                                                                                                            |
|-------------------------------------|-------------------------------------|------------------------------------------------------------------------------------------------------------------------------------------------------------------------------------------------------------------------------------------------------------|
| <input type="checkbox"/>            | <input checked="" type="checkbox"/> | The exact sample size ( $n$ ) for each experimental group/condition, given as a discrete number and unit of measurement                                                                                                                                    |
| <input type="checkbox"/>            | <input checked="" type="checkbox"/> | A statement on whether measurements were taken from distinct samples or whether the same sample was measured repeatedly                                                                                                                                    |
| <input type="checkbox"/>            | <input checked="" type="checkbox"/> | The statistical test(s) used AND whether they are one- or two-sided<br><i>Only common tests should be described solely by name; describe more complex techniques in the Methods section.</i>                                                               |
| <input checked="" type="checkbox"/> | <input type="checkbox"/>            | A description of all covariates tested                                                                                                                                                                                                                     |
| <input type="checkbox"/>            | <input checked="" type="checkbox"/> | A description of any assumptions or corrections, such as tests of normality and adjustment for multiple comparisons                                                                                                                                        |
| <input type="checkbox"/>            | <input checked="" type="checkbox"/> | A full description of the statistical parameters including central tendency (e.g. means) or other basic estimates (e.g. regression coefficient) AND variation (e.g. standard deviation) or associated estimates of uncertainty (e.g. confidence intervals) |
| <input type="checkbox"/>            | <input checked="" type="checkbox"/> | For null hypothesis testing, the test statistic (e.g. $F$ , $t$ , $r$ ) with confidence intervals, effect sizes, degrees of freedom and $P$ value noted<br><i>Give <math>P</math> values as exact values whenever suitable.</i>                            |
| <input checked="" type="checkbox"/> | <input type="checkbox"/>            | For Bayesian analysis, information on the choice of priors and Markov chain Monte Carlo settings                                                                                                                                                           |
| <input checked="" type="checkbox"/> | <input type="checkbox"/>            | For hierarchical and complex designs, identification of the appropriate level for tests and full reporting of outcomes                                                                                                                                     |
| <input checked="" type="checkbox"/> | <input type="checkbox"/>            | Estimates of effect sizes (e.g. Cohen's $d$ , Pearson's $r$ ), indicating how they were calculated                                                                                                                                                         |

*Our web collection on [statistics for biologists](#) contains articles on many of the points above.*

### Software and code

Policy information about [availability of computer code](#)

Data collection

Live-cell microscopy images were acquired with a Zeiss AxioObserver Z1 confocal spinning disc microscope with an EMM-CCD camera. Individual CHIP and RT-samples were analyzed by quantitative real-time PCR using QuantStudioTM 3 or QuantStudioTM 5 real-time PCR systems, and processed using Thermo Fisher ConnectTM.

Data analysis

Fiji/ImageJ 2.1.0/1.53c (regularly updated)  
Graphpad Prism 9.0.1  
Inkscape 1.0.2  
Photoshop 12.0.4  
R (v3.3.3 and v4.0.5)

For manuscripts utilizing custom algorithms or software that are central to the research but not yet described in published literature, software must be made available to editors and reviewers. We strongly encourage code deposition in a community repository (e.g. GitHub). See the Nature Research [guidelines for submitting code & software](#) for further information.

### Data

Policy information about [availability of data](#)

All manuscripts must include a [data availability statement](#). This statement should provide the following information, where applicable:

- Accession codes, unique identifiers, or web links for publicly available datasets
- A list of figures that have associated raw data
- A description of any restrictions on data availability

The data supporting the findings of this study are available within the paper and its supplementary information files.

## Field-specific reporting

Please select the one below that is the best fit for your research. If you are not sure, read the appropriate sections before making your selection.

Life sciences       Behavioural & social sciences       Ecological, evolutionary & environmental sciences

For a reference copy of the document with all sections, see [nature.com/documents/nr-reporting-summary-flat.pdf](https://www.nature.com/documents/nr-reporting-summary-flat.pdf)

## Life sciences study design

All studies must disclose on these points even when the disclosure is negative.

|                 |                                                                                                                                                                                                                                                                                                                                                                              |
|-----------------|------------------------------------------------------------------------------------------------------------------------------------------------------------------------------------------------------------------------------------------------------------------------------------------------------------------------------------------------------------------------------|
| Sample size     | Sample size of each measurement was based on similar studies and were selected to ensure robust and statistically significant comparisons (Berstein et al., 2013, PMID: 23790361; Ryu and Ahn, 2014; PMID: 25248920; Salvi et al., 2014; PMID: 25073155; Torres-Rosell et al., 2007, PMID: 17643116). No statistical methods were performed to predetermine the sample size. |
| Data exclusions | No data were excluded from the analysis.                                                                                                                                                                                                                                                                                                                                     |
| Replication     | For all experiments, at least two biological replicates were performed and each replicate was reliably reproduced.                                                                                                                                                                                                                                                           |
| Randomization   | For all yeast experiments (ChIP, coIP, IP, Ni-NTA, rDNA marker loss, RT-qPCR, WB, Y2H), cultures were grown under the same conditions and collected randomly without any bias. Microscopy data were generated from randomly selected cells (DIC channel) across several fields before analysis in the respective fluorescence channel.                                       |
| Blinding        | For the analysis, blinded visual scoring of rDNA damage retention in human cells and nucleolar rDNA localization in yeast cells was performed. For all other experiments, no blinding assessment was performed.                                                                                                                                                              |

## Reporting for specific materials, systems and methods

We require information from authors about some types of materials, experimental systems and methods used in many studies. Here, indicate whether each material, system or method listed is relevant to your study. If you are not sure if a list item applies to your research, read the appropriate section before selecting a response.

### Materials & experimental systems

| n/a                                 | Involved in the study                                     |
|-------------------------------------|-----------------------------------------------------------|
| <input type="checkbox"/>            | <input checked="" type="checkbox"/> Antibodies            |
| <input type="checkbox"/>            | <input checked="" type="checkbox"/> Eukaryotic cell lines |
| <input checked="" type="checkbox"/> | <input type="checkbox"/> Palaeontology and archaeology    |
| <input checked="" type="checkbox"/> | <input type="checkbox"/> Animals and other organisms      |
| <input checked="" type="checkbox"/> | <input type="checkbox"/> Human research participants      |
| <input checked="" type="checkbox"/> | <input type="checkbox"/> Clinical data                    |
| <input checked="" type="checkbox"/> | <input type="checkbox"/> Dual use research of concern     |

### Methods

| n/a                                 | Involved in the study                           |
|-------------------------------------|-------------------------------------------------|
| <input checked="" type="checkbox"/> | <input type="checkbox"/> ChIP-seq               |
| <input checked="" type="checkbox"/> | <input type="checkbox"/> Flow cytometry         |
| <input checked="" type="checkbox"/> | <input type="checkbox"/> MRI-based neuroimaging |

## Antibodies

### Antibodies used

- anti-Smt3, Rabbit polyclonal, homemade (Hoegel et al., 2002, PMID: 12226657), diluted 1:5,000 for western blot.
- anti-Slx5, Rabbit polyclonal, homemade (Höpfler et al., 2019, PMID: 31015336), diluted 1:5,000 for western blot.
- anti-Cdc48, Rabbit polyclonal, homemade (Richly et al., 2005, PMID: 15652483), diluted 1:5,000 for western blot.
- anti-HA (3F10), Rat monoclonal, Roche Cat# 11867423001, diluted 1:1,000 for western blot.
- anti-GFP (B-2), Mouse monoclonal, Santa Cruz Biotechnology Cat# sc-9996, diluted 1:1,000 for western blot.
- anti-Dpm1 (5C5A7), Mouse monoclonal, Invitrogen Cat# A-6429, diluted 1:2,000 for western blot.
- anti-Pgk1 (22C5D8), Mouse monoclonal, Invitrogen Cat# 459250, diluted 1:5,000 for western blot.
- anti-Rad53, Rabbit polyclonal, Abcam Cat# ab104232, diluted 1:1,000 for western blot.
- peroxidase anti-peroxidase, Rabbit polyclonal, Sigma Cat# P1291, diluted 1:1,000 for western blot.
- anti-Rat IgG/HRP conjugate, Goat polyclonal, Merck Millipore Cat# AP136P, diluted 1:3,000 for western blot.
- anti-Mouse IgG/HRP conjugate, Goat polyclonal, BioRad Cat# 170-6516, diluted 1:3,000 for western blot.
- anti-Rabbit IgG/HRP conjugate, Goat polyclonal, BioRad Cat# 170-6515, diluted 1:3,000 for western blot.
- anti-Nucleophosmin, Rabbit polyclonal, Abcam Cat# ab15440, diluted 1:100 for immunofluorescence.
- anti-phospho-H2AX Ser139 (JBW301), Mouse monoclonal, Merck Millipore Cat# 05-636, diluted 1:1,000 for immunofluorescence.
- anti-Mouse IgG/Alexa fluor 488, Goat polyclonal, Thermo Fisher Scientific Cat# A11001, diluted 1:5,000 for immunofluorescence.
- anti-Rabbit IgG/Alexa fluor 568, Donkey polyclonal, Thermo Fisher Scientific Cat# A10042, diluted 1:5,000 for immunofluorescence.
- GFP-Trap Agarose, Chromotek Cat# gta-100, for immunoprecipitation.
- anti-HA Affinity Matrix, Roche Cat# 11815016001, for immunoprecipitation.
- Rabbit IgG-Agarose, Sigma Cat A2909-5ML, for immunoprecipitation.

### Validation

The Smt3, Slx5 and Cdc48 antibodies have been described and validated previously by WB (Hoegel et al., 2002, PMID: 12226657, DOI: 10.1038/nature00991; Richly et al., 2005, PMID: 15652483, DOI: 10.1016/j.cell.2004.11.013; Höpfler et al., 2019, PMID: 31015336, DOI: 10.15252/embj.2018100368). All other antibodies are commercially available and were validated by the manufacturers.

## Eukaryotic cell lines

### Policy information about [cell lines](#)

#### Cell line source(s)

Human cell lines: RPE cells stably expressing I-Ppol were a gift from René H. Medema (Netherlands Cancer Institute).

Yeast strains used in this study:

DF5: trp1-1 ura3-52 his3Δ200 leu2-3,11 lys2-801

MC0064: DF5, MATα HEH1-L-EGFP::HIS3MX6

MC0479: DF5, MATα HEH1-L-EGFP::HIS3MX6 nur1Δ::kanMX6

MC0659: DF5, MATα HEH1-L-EGFP::HIS3MX6 CSM1-TAP::kanMX6

MC0184: DF5, MATα HEH1-L-EGFP::HIS3MX6 nur1Δ::kanMX6 CSM1-TAP::kanMX6

MC0628: DF5, MATα LRS4-3HA::KITRP1

MC0682: DF5, MATα LRS4-3HA::KITRP1 nur1Δ::kanMX6

MC0656: DF5, MATα LRS4-3HA::KITRP1 natNT2::pHEH1::GFP-HEH1

MC0690: DF5, MATα LRS4-3HA::KITRP1 natNT2::pHEH1::GFP-HEH1 nur1Δ::kanMX6

MC0073: DF5, MATα natNT2::pMET25::yeGFP-LRS4

MC0089: DF5, MATα natNT2::pMET25::yeGFP-LRS4 csm1Δ::hphNT1

MC0644: DF5, MATα natNT2::pMET25::yeGFP-LRS4 NUR1-3HA::KITRP1

MC0090: DF5, MATα natNT2::pMET25::yeGFP-LRS4 csm1Δ::hphNT1 NUR1-3HA::KITRP1

MC0607: DF5, MATα natNT2::pMET25::yeGFP-LRS4 nur1Δ54-3HA (1-430aa)::KITRP1

MC0319: DF5, MATα natNT2::pMET25::yeGFP-LRS4 nur1ΔC-3HA (1-295aa)::KITRP1

MC0629: DF5, MATα CSM1-TAP::kanMX6

MC0761: DF5, MATα HEH1-L-EGFP::HIS3MX6 CSM1-TAP::kanMX6 lrs4Δ::hphNT1

MC0660: DF5, MATα HEH1-L-EGFP NUR1-3HA::KITRP1

MC0606: DF5, MATα HEH1-L-EGFP nur1Δ54-3HA (1-430aa)::KITRP1

MC0318: DF5, MATα HEH1-L-EGFP nur1ΔC-3HA (1-295aa)::KITRP1

MC0731: DF5, MATα NET1::AIDx4-9Myc::HIS3MX6 URA3::pADH1::OsTIR1-9Myc Nur1-3HA::KITRP1

MC0996: DF5, MATα NET1::AIDx4-9Myc::HIS3MX6 URA3::pADH1::OsTIR1-9Myc Nur1-3HA::KITRP1 natNT2::pMET25::yeGFP-LRS4

MC0630: DF5, MATα NUR1-3HA::KITRP1

MC0760: DF5, MATα HEH1-L-EGFP NUR1-3HA::KITRP1 lrs4Δ::hphNT1

MC0723: DF5, MATα NUR1-3HA::KITRP1 URA3::pADH1::6His-SMT3

MC0724: DF5, MATα HEH1-LEGFP NUR1-3HA::KITRP1 URA3::pADH1::6His-SMT3

MC0650: DF5, MATα natNT2::pMET25::yeGFP-LRS4 NUR1-3HA::KITRP1 URA3::pADH1::6His-SMT3

MC0076: DF5, MATα NUR1-3HA::KITRP1 natNT2::pADH1::yeGFP-SMT3

MC0473: DF5, MATα NUR1-3HA::KITRP1 siz1Δ::HIS3MX6

MC0474: DF5, MATα NUR1-3HA::KITRP1 natNT2::pADH1::yeGFP-SMT3 siz1Δ::HIS3MX6

MC0475: DF5, MATα NUR1-3HA::KITRP1 siz2Δ::HIS3MX6

MC0476: DF5, MATα NUR1-3HA::KITRP1 natNT2::pADH1::yeGFP-SMT3 siz2Δ::HIS3MX6

MC0245: DF5, MATα NUR1-3HA::KITRP1 sir2Δ::HIS3MX6

MC0246: DF5, MATα NUR1-3HA::KITRP1 natNT2::pADH1::yeGFP-SMT3 sir2Δ::HIS3MX6

MC0811: DF5, MATα NUR1-3HA::KITRP1 sir4Δ::hphNT1

MC0812: DF5, MATa NUR1-3HA::KITRP1 natNT2::pADH1::yeGFP-SMT3 sir4Δ::hphNT1  
 MC0634: DF5, MATa nur1Δ::kanMX6  
 MC0077: DF5, MATa nur1Δ::kanMX6 natNT2::pADH1::yeGFP-SMT3  
 MC0435: DF5, MATα URA3::pADH1::6HisS-MT3  
 MC0026: DF5, MATα heh1Δ::natNT2  
 MC0429: DF5, MATα lrs4Δ::hphNT1  
 MC0692: DF5, MATa CSM1-TAP::kanMX6 heh1Δ::natNT2  
 MC0733: DF5, MATa CSM1-TAP::kanMX6 URA3::pADH1::6His-SMT3  
 MC0066: DF5, MATα TOF2-TAP::kanMX6  
 MC0377: DF5, MATa natNT2::pMET25::yeGFP-LRS4 NUR1-3HA::KITRP1 slx8Δ::hphNT1  
 MC0378: DF5, MATa natNT2::pMET25::yeGFP-LRS4 NUR1-3HA::KITRP1 slx5Δ::HIS3MX6 slx8Δ::hphNT1  
 ML118-1D: MATa ADE2 RAD52-YFP RDN25::224xtetO-URA3-I-Scel TetI-mRFP1-iYGL119W  
 MC0857: ML118-1D, MATa NUR1-6HA::HIS3MX6  
 MC0858: ML118-1D, MATa nur1 K175-176R-6HA (1-430aa)::HIS3MX6  
 MC0859: ML118-1D, MATa nur1Δ54-6HA (1-430aa)::HIS3MX6  
 MC0860: ML118-1D, MATa nur1ΔC-6HA (1-295aa)::HIS3MX6  
 MC0678: ML118-1D, MATa nur1Δ::kanMX6  
 MC0370: ML118-1D, MATa SMT3::kanMX6::pADH1::6His-SMT3  
 MC0079: ML118-1D, MATa ufd1ΔSIM (1-355aa)::kanMX6  
 MC1048: ML118-1D, MATa NUP49-mars::hphNT1 lrs4Δ::natNT2  
 PJ69-7a: trp-901-, leu2-3,112 ura3-53 his3-200 gal4Δ gal80Δ GAL1::HIS GAL2-ADE2 met2::GAL7-lacZ  
 Y187: MATα ura3-52 his3-200 trp1-901 leu2-3,112 ade2-101 gal4Δ met- gal80Δ URA3::GAL1UAS-GAL1TATA::LacZ MEL1  
 Y2H Gold: MATa ura3-52 his3-200 trp1-901 leu2-3,112 gal4Δ gal80Δ LYS2::GAL1UAS-GAL1TATA::HIS3 GAL2UAS-GAL2TATA::ADE2 URA3::MEL1UAS-MEL1TATA::AUR1-C MEL1  
 W303 (RAD5): ade2-1 can1-100 his3-11,15 leu2-3,112 trp1-1 ura3-1 RAD5  
 MC0727: W303, MATα natNT2::pMET25::yeGFP-LRS4  
 MC0836: W303, MATα NET1-EGFP::HIS3MX6  
 MC0837: W303, MATα TOF2-EGFP::HIS3MX6  
 MC0566: W303, MATa NUR1-6HA::HIS3MX6  
 MC0848: W303, MATa NUR1-6HA::HIS3MX6 natNT2::pMET25::yeGFP-LRS4  
 MC0938: W303, MATα NUR1-6HA::HIS3MX6 natNT2::pMET25::yeGFP-LRS4 cdc14-3  
 MC0939: W303, MATa NUR1-6HA::HIS3MX6 natNT2::pMET25::yeGFP-LRS4 cdc14-3  
 MC0462: W303, MATa NUR1-6HA::HIS3MX6 natNT2::pMET25::yeGFP-LRS4 ufd1-2::kanMX6  
 MC0478: W303, MATa NUR1-6HA::HIS3MX6 natNT2::pMET25::yeGFP-LRS4 ufd1ΔSIM (1-355aa)::kanMX6  
 MC0117: W303, MATa NUR1-6HA::HIS3MX6 uls1Δ::kanMX6  
 MC0119: W303, MATa NUR1-6HA::HIS3MX6 natNT2::pMET25::yeGFP-LRS4 uls1Δ::kanMX6  
 MC0947: W303, MATa HEH1-EGFP::HIS3MX6  
 MC0948: W303, MATa HEH1-EGFP::HIS3MX6 LRS4-TAP::kanMX6  
 MC0991: W303, MATa HEH1-EGFP::HIS3MX6 LRS4-TAP::kanMX6 ChrIII92.5kb::natNT2::pGALL::3HA-SV40 NLS-I-PPOI  
 MC0992: W303, MATa HEH1-EGFP::HIS3MX6 LRS4-TAP::kanMX6 ChrIII92.5kb::natNT2::pGALL::3HA-SV40 NLS-I-PPOI  
 MC0163: W303, MATa NUR1-6HA::HIS3MX6 URA3::pGAL1::CDC48::ADHt  
 MC0164: W303, MATa natNT2::pMET25::yeGFP-LRS4 URA3::pGAL1::CDC48::ADHt  
 MC0165: W303, MATa NUR1-6HA::HIS3MX6 natNT2::pMET25::yeGFP-LRS4 URA3::pGAL1::CDC48::ADHt  
 MC0168: W303, MATa NUR1-6HA::HIS3MX6 natNT2::pMET25::yeGFP-LRS4 URA3::pGAL1::cdc48-6::ADHt  
 MC0167: W303, MATa NUR1-6HA::HIS3MX6 natNT2::pMET25::yeGFP-LRS4 URA3::pGAL1::cdc48 E588Q::ADHt  
 MC0549: W303, MATa CDC14-TAP::kanMX6  
 MC0717: W303, MATa RDN1::ADE2  
 MC0669: W303, MATa RDN1::ADE2 nur1Δ::kanMX6  
 MC0953: W303, MATα RDN1::ADE2 csm1Δ::HIS3MX6  
 MC1005: W303, MATa RDN1::ADE2 uaf30Δ::kanMX6  
 MC1050: W303, MATα RDN1::ADE2 uaf30Δ::kanMX6 csm1Δ::HIS3MX6  
 MC1029: W303, MATa RDN1::ADE2 uaf30Δ::kanMX6 nur1Δ::kanMX6  
 MC0641: W303, MATa RDN1::ADE2 lrs4Δ::hphNT1  
 MC0982: W303, MATα RDN1::ADE2 ULP2-6HA::HIS3MX6  
 MC0983: W303, MATα RDN1::ADE2 ulp2ΔC-6HA (1-781aa)::HIS3MX6  
 MC1032: W303, MATa RDN1::ADE2 NUR1-6HA-ULP1-CD::HIS3MX6  
 MC1033: W303, MATa RDN1::ADE2 NUR1-6HA-ulp1-CDi F474A C580S::HIS3MX6  
 MC0622: W303, MATa RDN1::ADE2 NUR1-3HA::KITRP1  
 MC0623: W303, MATa RDN1::ADE2 nur1 K175-176R-3HA::KITRP1  
 MC0743: W303, MATa RDN1::ADE2 NUR1-3HA::KITRP1 rad52Δ::HIS3MX6  
 MC0744: W303, MATa RDN1::ADE2 nur1 K175-176R-3HA::KITRP1 rad52Δ::HIS3MX6  
 MC0878: W303, MATa RDN1::ADE2 NUR1-6HA::HIS3MX6  
 MC0879: W303, MATa RDN1::ADE2 nur1 K175-176R-6HA::HIS3MX6  
 MC0880: W303, MATa RDN1::ADE2 NUR1-6HA::HIS3MX6 lrs4Δ::hphNT1  
 MC0881: W303, MATa RDN1::ADE2 nur1 K175-176R-6HA::HIS3MX6 lrs4Δ::hphNT1  
 MC0160: W303, MATa RDN1::ADE2 ufd1ΔSIM (1-355aa)::kanMX6  
 MC0161: W303, MATa RDN1::ADE2 ufd1ΔSIM (1-355aa)::kanMX6 lrs4Δ::hphNT1  
 MC0994: W303, MATa RDN1::ADE2 ufd1ΔSIM (1-355aa)::kanMX6 nur1Δ::natNT2  
 MC0773: W303, MATa RDN1::ADE2 ctf4Δ::natNT2

MC0774: W303, MATa RDN1::ADE2 ctf4Δ::natNT2 ufd1ΔSIM (1-355aa)::kanMX6  
MC0771: W303, MATa RDN1::ADE2 rrm3Δ::natNT2  
MC0772: W303, MATa RDN1::ADE2 rrm3Δ::natNT2 ufd1ΔSIM (1-355aa)::kanMX6  
MC1001: W303, MATa RDN1::ADE2 NUR1-6HA::HIS3MX6 ctf4Δ::natNT2  
MC1002: W303, MATa RDN1::ADE2 nur1 K175-176R-6HA::HIS3MX6 ctf4Δ::natNT2

## Authentication

All strains were generated by transformation and/or using genetic crosses. Strain verification was performed by the presence/absence of selection marker genes and/or by PCR to corroborate the desired genetic modification and/or by western blot to confirm the presence of epitope tags, as appropriate. Human RPE cells were not authenticated.

## Mycoplasma contamination

No testing for mycoplasma was required.

Commonly misidentified lines  
(See [ICLAC](#) register)

No commonly misidentified lines were used.
