# Supplementary material for: Nucleolar release of rDNA repeats for repair involves SUMO-mediated untethering by the Cdc48/p97 segregase
Source: Nat Commun. 2021 Aug 13;12:4918. doi: 10.1038/s41467-021-25205-2 (PMC8363623; doi:10.1038/s41467-021-25205-2)
Supplement: Supplementary file 1 — Supplementary Information [file 41467_2021_25205_MOESM1_ESM.pdf]

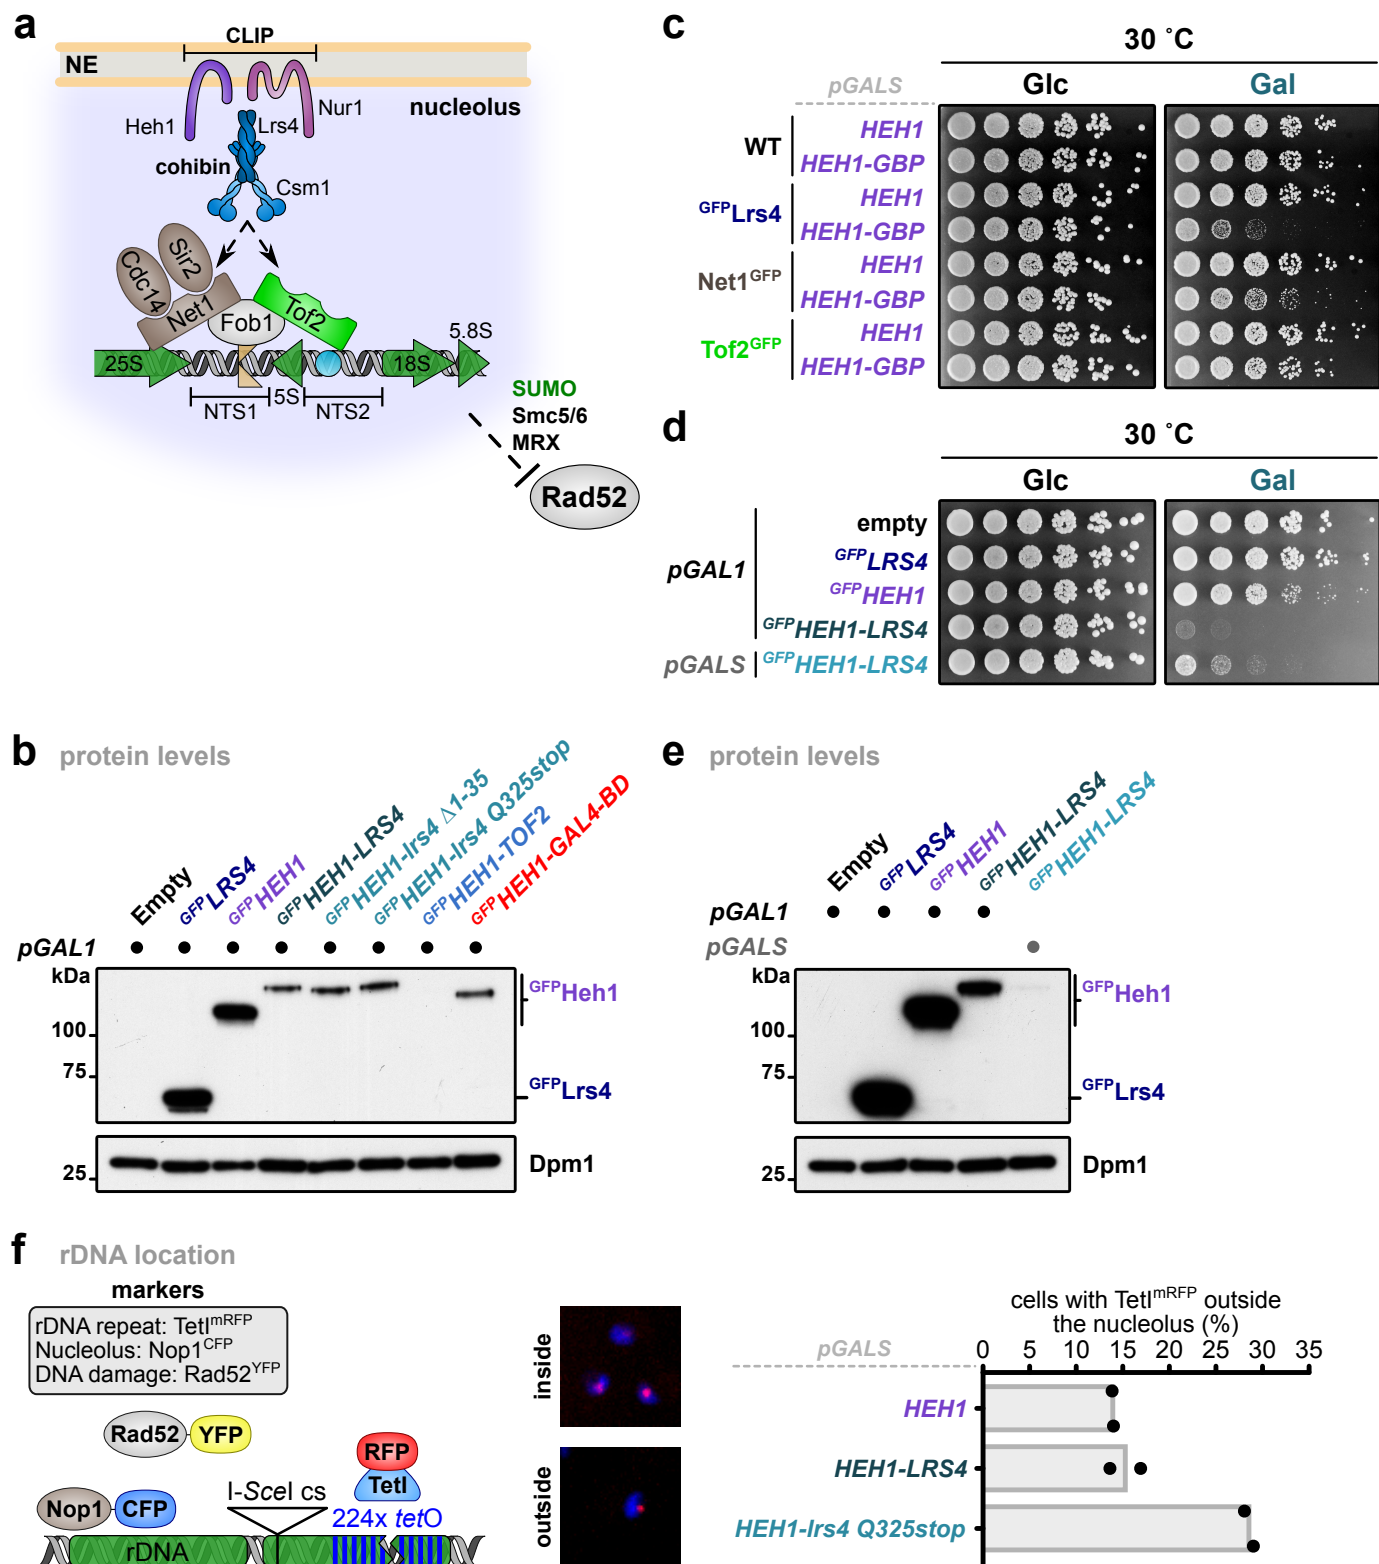

**Supplementary Fig. 1 Disruption of rDNA dynamics causes severe growth defects in yeast.**

**a**, Scheme of an rDNA unit bound by the tethering complex in *Saccharomyces cerevisiae*. Each repeat of 9.1 kb presents a near-identical sequence comprising the 35S (subdivided in 5.8S, 18S and 25S) and 5S ribosomal RNA coding genes. Polymerase II silenced regions are known as NTS1 (non-transcribed spacer 1) and NTS2 regions, which are located down- and upstream of the 5S gene, respectively. NTS1 contains the replication fork barrier (RFB), whereas NTS2 contains an autonomous replicating sequence (ARS). The rDNA units are attached to the inner nuclear membrane via interaction between cohibin (Lrs4 and Csm1) and CLIP (Heh1 and Nur1). Cohibin then binds to the NTS1 region of the rDNA repeats through an rDNA-bound protein complex that includes Fob1, Tof2 and the RENT complex (regulator of nucleolar silencing and telophase exit; composed of Cdc14, Net1 and Sir2). SUMO together with the MRX and Smc5/6 complexes exclude Rad52 from the nucleolus. **b**, Immunoblot of WT cells transformed with empty vector or plasmids bearing GFP-tagged *LRS4*, *HEH1* or fusion proteins with the galactose-inducible promoter after induction. Dpm1 served as loading control. **c** and **d**, Five-fold serial dilutions of WT, *GFP<sup>Lrs4</sup>*, *Net1<sup>GFP</sup>* and *Tof2<sup>GFP</sup>* cells transformed with empty vector or a plasmid bearing *HEH1* fused to GFP-binding protein (GBP) with the weaker *GALS* promoter (**c**); and of WT cells transformed with empty vector or plasmids

**Supplementary Fig. 1 (cont.):** bearing the indicated GFP-tagged fusion proteins with different galactose-inducible promoters (either *pGAL1* or *pGALS*), as indicated (**d**). Cells were spotted and grown on selective media with 2% glucose (control, Glc) or 2% galactose (induction, Gal) at 30°C for 3 days. **e**, Immunoblot of the strains used in **d**, after galactose induction. Dpm1 served as loading control. **f**, Left: Scheme of fluorescent markers used to quantify rDNA location. Cells bear a *tetO* array adjacent to an I-SceI endonuclease cut site inserted into an rDNA unit on chromosome XII, which is revealed by TetI<sup>mRFP</sup> foci. These cells also express Rad52<sup>YFP</sup> as a marker of the HR machinery. The nucleolus is visualized by a plasmid expressing the nucleolar protein Nop1<sup>ECFP</sup>. Representative images are shown (note that the images are the same as the ones presented in Fig. 2g). Scale bar, 2 μm. Right: Percentage of undamaged cells with rDNA repeats localized outside the nucleolus. The different WT strains were transformed with plasmids bearing the indicated GFP-tagged proteins with the *GALS* promoters, and were constantly grown on selective medium with 2% galactose. Repeat location was monitored by the position of TetI<sup>mRFP</sup> focus relative to the nucleolar mark, and quantification is shown. Data are mean of *n* = 2 independent biological replicates. For **b** and **e**, the different strains were grown to mid-log phase, fusion proteins were induced by adding 2% galactose for 2 h 30'. Source data are provided as a Source Data file.

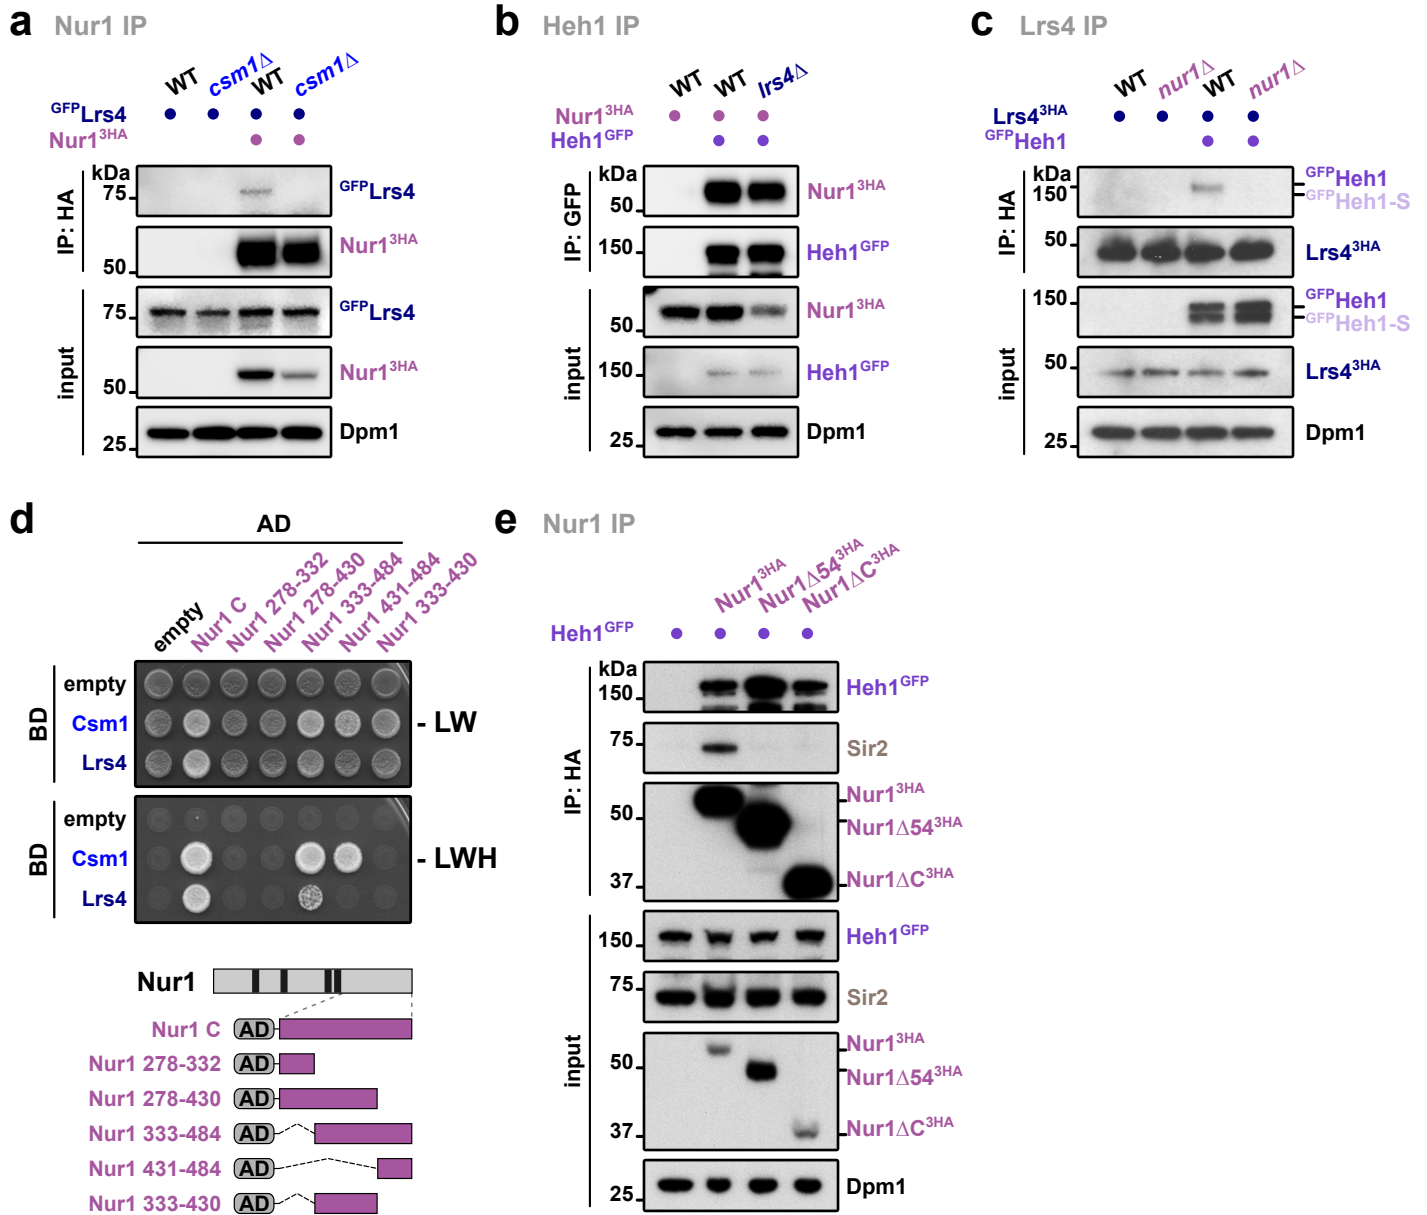

**Supplementary Fig. 2 The C-terminal residues of Nur1 are required for CLIP-cohibin complex formation.**

**a to c**, Co-immunoprecipitation of <sup>GFP</sup>Lrs4 with Nur1<sup>3HA</sup> in WT or *csm1*Δ cells (**a**); of Nur1<sup>3HA</sup> with Heh1<sup>GFP</sup> in WT or *lrs4*Δ cells (**b**); and of <sup>GFP</sup>Heh1 with Lrs4<sup>3HA</sup> in WT and *nur1*Δ cells (**c**). Due to N-terminal tagging of Heh1, both spliced versions (denoted as Heh1 and Heh1-S) can be detected in **c**. Dpm1 served as loading control. **d**, Y2H analysis of Csm1 and Lrs4 with either Nur1 C or truncated mutants. Fusions with Gal4-activating domain (AD) or Gal4-DNA-binding domain (BD) are indicated. Schematic showing Nur1 truncated constructs. **e**, Co-immunoprecipitation of Heh1<sup>GFP</sup> and Sir2 with either HA-tagged Nur1 full-length (Nur1<sup>3HA</sup>), lacking its last 54 residues (Nur1Δ54<sup>3HA</sup>) or the complete C-terminal domain (Nur1ΔC<sup>3HA</sup>). Dpm1 served as loading control. For Y2H assays, cells were spotted on control media (-LW) or selective media (-LWH) and grown for 3 days. Source data are provided as a Source Data file.

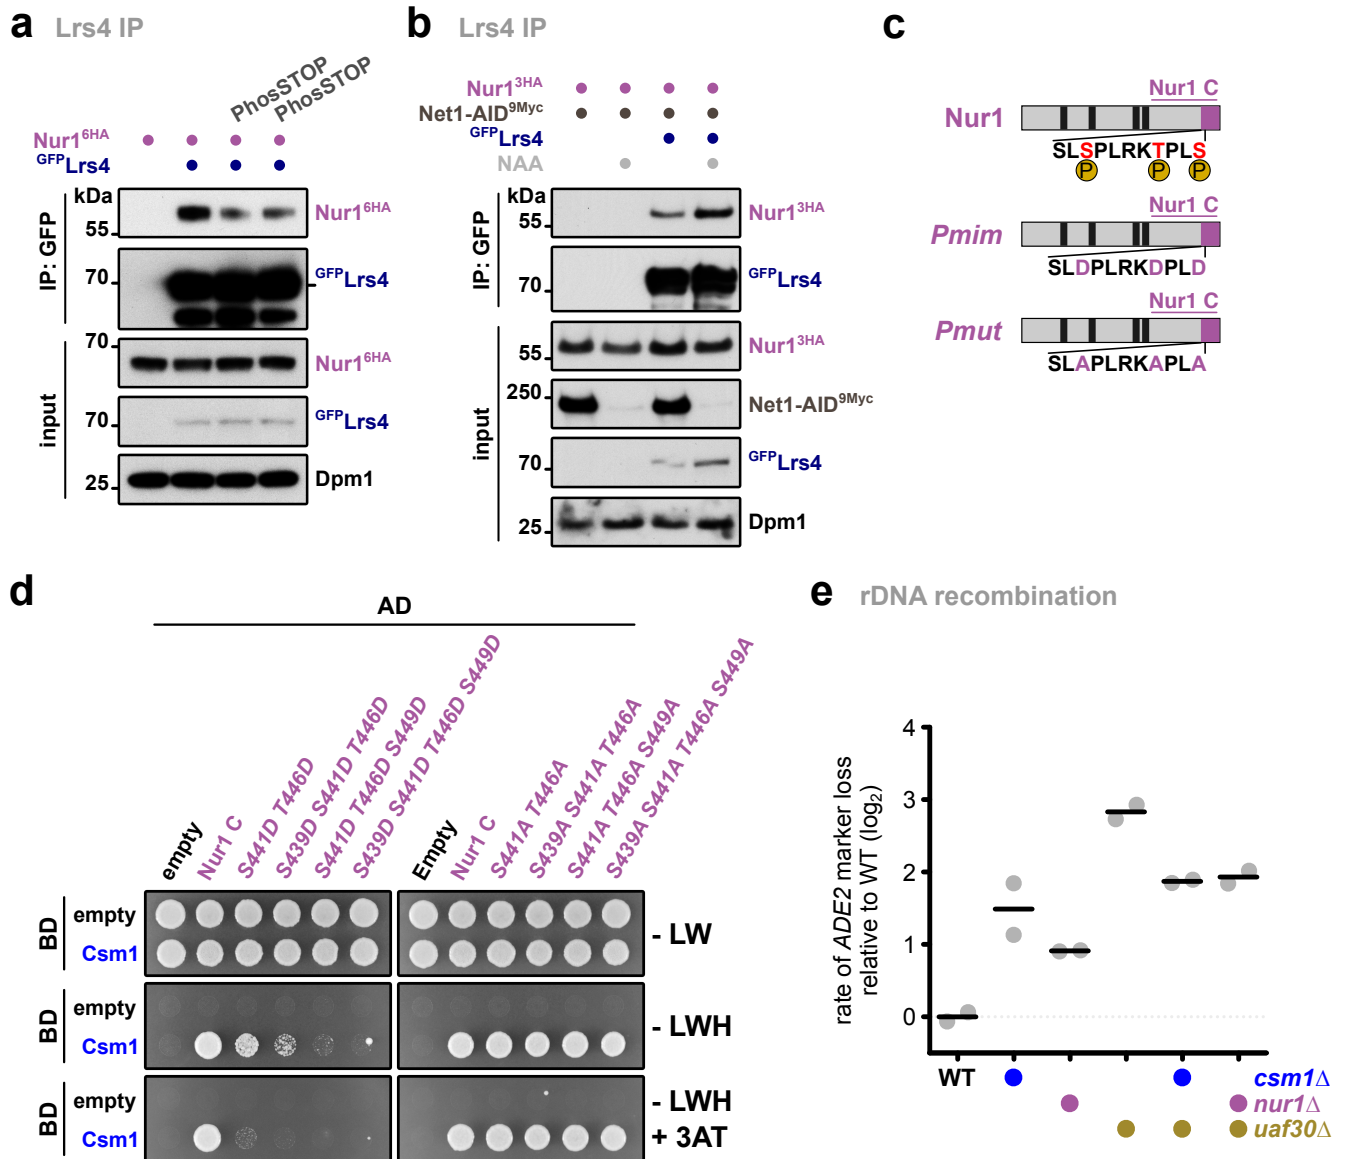

### Supplementary Fig. 3 Phosphorylation of C-terminal Nur1 impairs CLIP-cohibin interaction.

**a**, Co-immunoprecipitation of Nur1<sup>3HA</sup> with GFP-Lrs4 in WT with impaired global phosphatase activity (PhosSTOP). One untreated and two independently treated samples are shown. Dpm1 served as loading control. **b**, Co-immunoprecipitation of Nur1<sup>3HA</sup> with GFP-Lrs4 in WT or Net1-depleted cells. Degradation of a C-terminal AID (auxin inducible degron) fusion of Net1 (Net1-AID<sup>9Myc</sup>) was induced through treatment with 1-naphthaleneacetic acid 1.5 mM (NAA, a synthetic analog of auxin) for 2 h. Dpm1 served as loading control. **c**, Schematic highlighting Nur1 residues important for CLIP-cohibin interaction in red. Amino acids 439 to 449 are depicted. P, phosphorylation. **d**, Y2H analysis of Csm1 (BD) with Nur1 C and phosphomimetic (left) or phosphomutant (right) constructs (AD), as indicated. Cells were spotted on control media (-LW) or selective media (-LWH or -LWH + 3AT 1 mM) and grown for 3 days. **e**, Quantification of rDNA recombination rates in WT, *csm1Δ*, *nur1Δ*, *uaf30Δ* cells, or combination thereof, as measured by loss of an *ADE2* marker inserted into rDNA. The rate of marker loss is calculated as the ratio of half-sectored colonies to the total number of colonies, excluding completely red colonies. Data are mean of *n* = 2 independent biological replicates, shown in log<sub>2</sub> scale relative to WT. Source data are provided as a Source Data file.

## a global SUMOylation

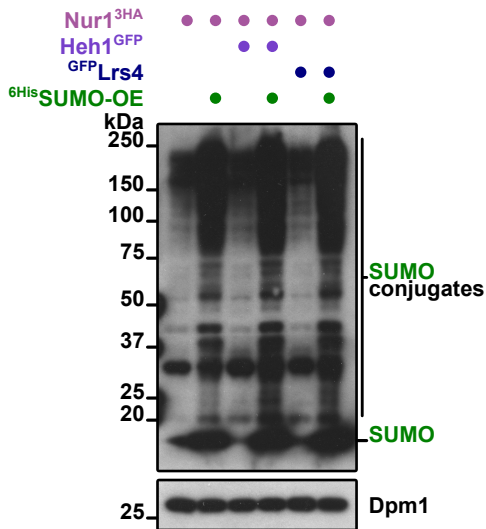

## b rDNA recombination

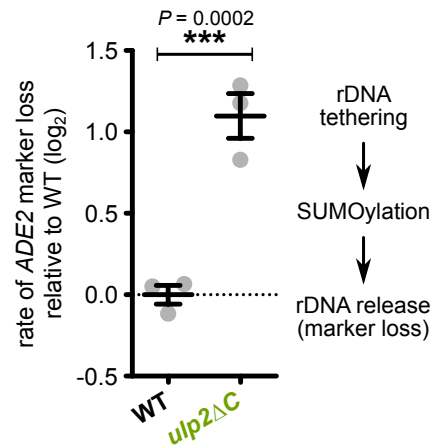

## c RT-qPCR at rDNA

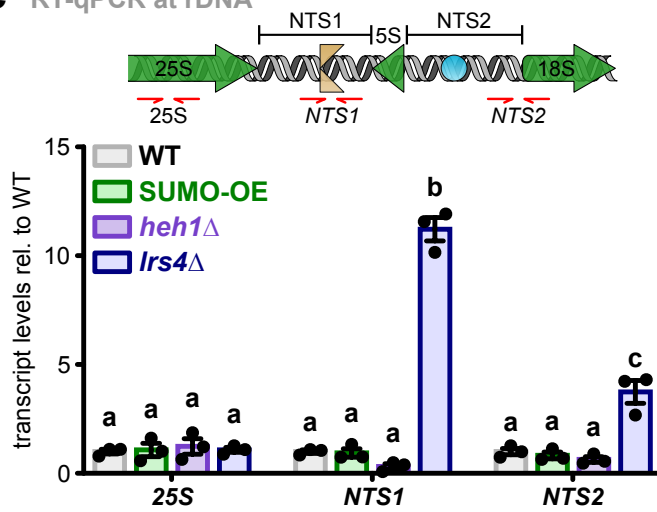

## e protein levels

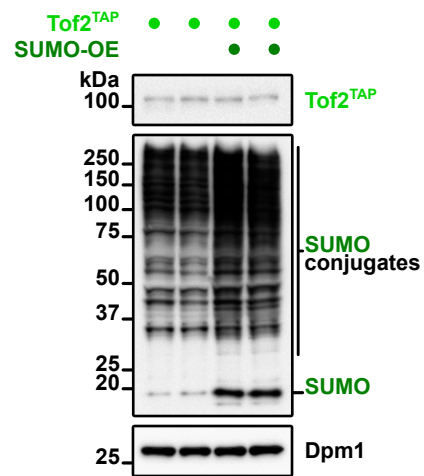

## d Cdc14 and Tof2 ChIP

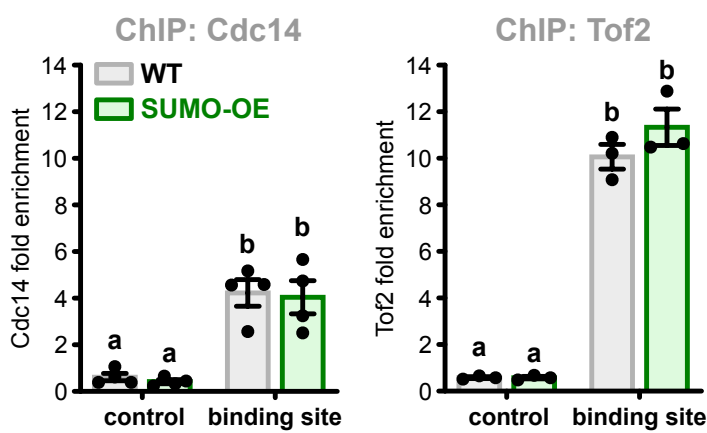

## f Csm1 ChIP

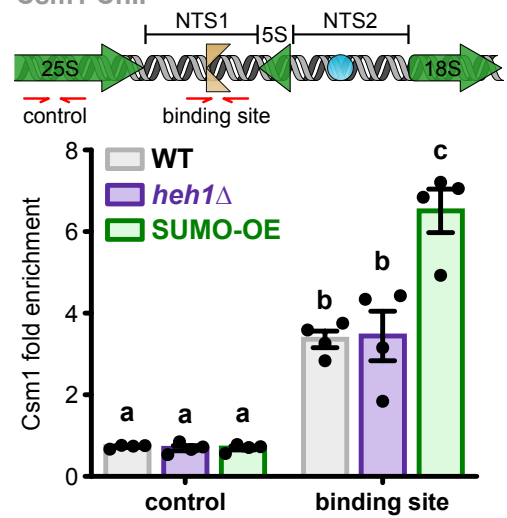

## g Nur1 phosphorylation

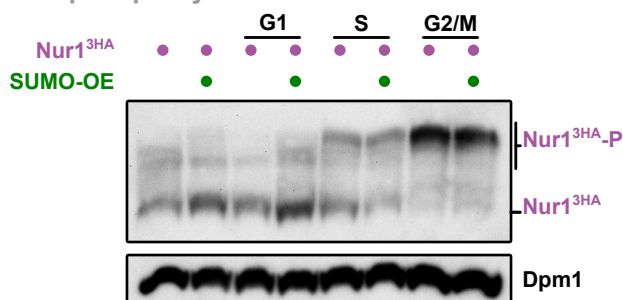

**Supplementary Fig. 4 Overexpression of SUMO increases rDNA instability by releasing the repeats from the nucleolus.**

**a**, Immunoblot of SUMO conjugates of cells from Fig. 4a, expressing SUMO at endogenous levels or overexpressed from the *ADH1* promoter (<sup>6His</sup>SUMO-OE). Dpm1 served as loading control. **b**, Rates of rDNA recombination in WT and *ulp2ΔC* cells. The rate of marker loss is calculated as the ratio of half-sectored colonies to the total number of colonies, excluding completely red colonies; data is shown in log<sub>2</sub> scale relative to WT. Statistical analysis was performed using two-tailed Student's t-test from *n* = 3 biological independent experiments. **c**, RT-qPCR analysis of WT, SUMO-OE, *heh1Δ* and *lrs4Δ* strains (*n* = 3). Shown are transcript levels relative to WT after normalization to *ACT1*. Illustration shows a schematic representation of an rDNA unit. Amplified regions are highlighted with red arrows. NTS, non-transcribed spacer; yellow symbol, replication fork block; blue symbol, ARS. **d**, Cdc14<sup>TAP</sup> (left; *n* = 4) or Tof2<sup>TAP</sup> (right; *n* = 3) binding to rDNA repeats in cells expressing SUMO at endogenous or overexpressed levels (SUMO-OE), quantified by ChIP-qPCR. SUMO was overexpressed in Cdc14<sup>TAP</sup> or Tof2<sup>TAP</sup> strains from vectors with the *GAL1* or the *TEF1* promoter, respectively. The amplified regions are the same as shown in **f**. **e**, Immunoblot of Tof2<sup>TAP</sup> and SUMO conjugates from strains expressing SUMO at endogenous levels or overexpressed from vectors with the *TEF1* promoter (SUMO-OE). Blots from 2 independent biological clones are shown. Dpm1 served as loading control. **f**, Csm1<sup>TAP</sup> binding to rDNA repeats in WT, *heh1Δ* and SUMO overexpressing (SUMO-OE) cells, quantified by ChIP-qPCR (*n* = 4). Scheme of an rDNA repeat is shown as in **c**; in red are marked the amplified regions. **g**, Nur1<sup>3HA</sup> phosphorylation-dependent mobility shifts in cells expressing SUMO at endogenous levels or overexpressed from the *ADH1* promoter (<sup>6His</sup>SUMO-OE), analyzed using Phos-tag gels (note that molecular weight estimations using markers is not possible with Phos-tag gels). Cells were arrested in G1, S and G2/M by treating the cells with α-factor, HU 100 mM or nocodazole 5 μg/ml for 2 h, respectively. Dpm1 served as loading control. For **b**, **c**, **d** and **f**, data are mean ± SEM of *n* independent biological replicates. For **d** and **f**, the ChIP values are shown as fold enrichment over the average of three rDNA positions, after normalization to input. Statistical analysis was performed using analysis of variance (ANOVA), and different letters denote significant differences with a Tukey's *post hoc* test at *P* ≤ 0.05. Source data are provided as a Source Data file.

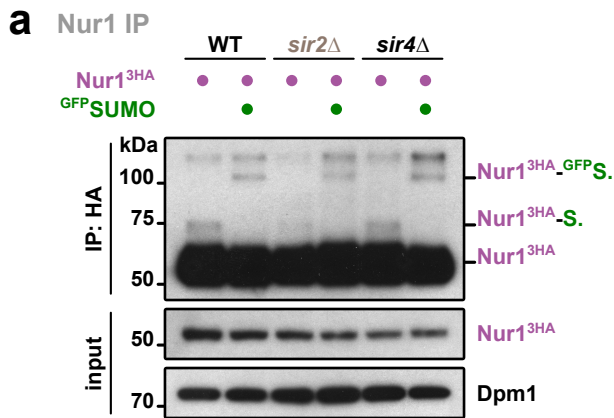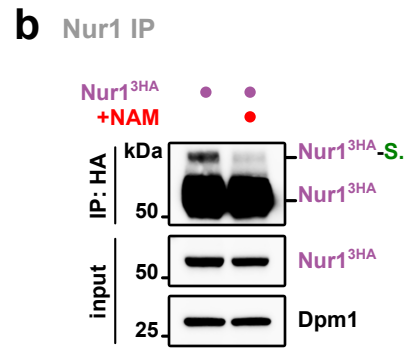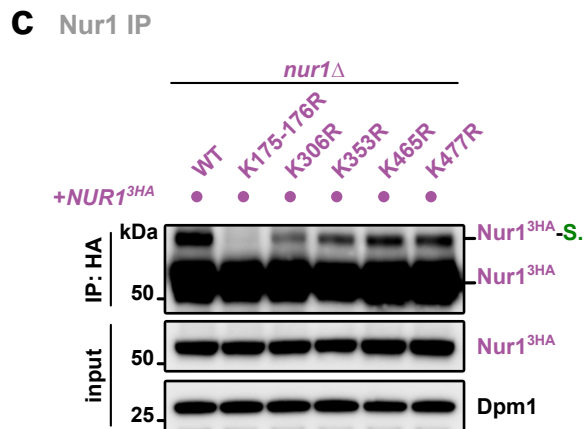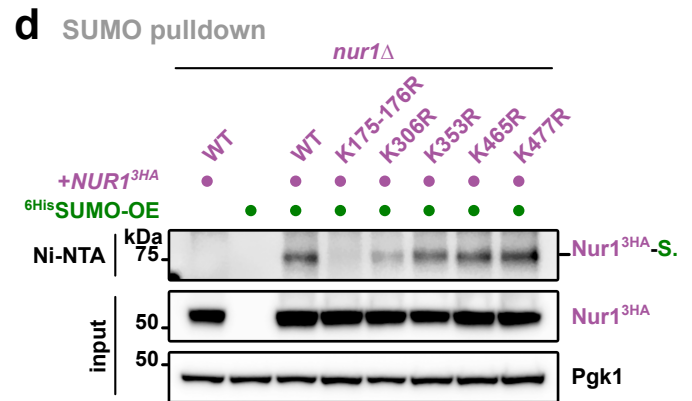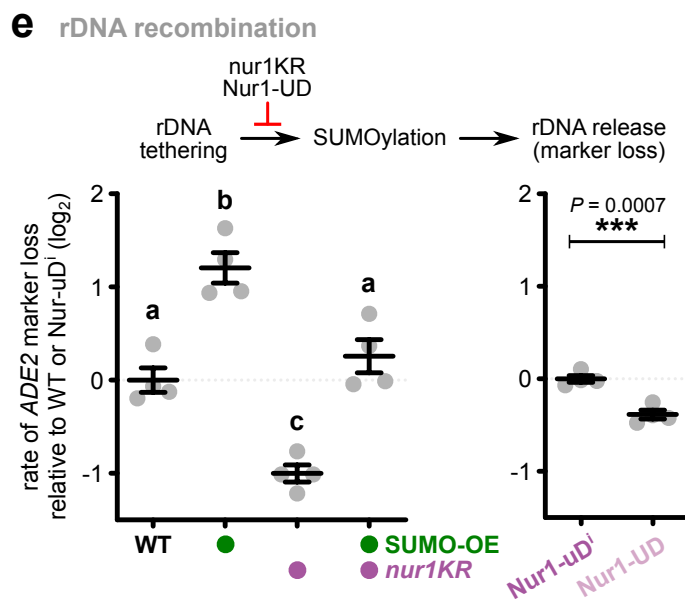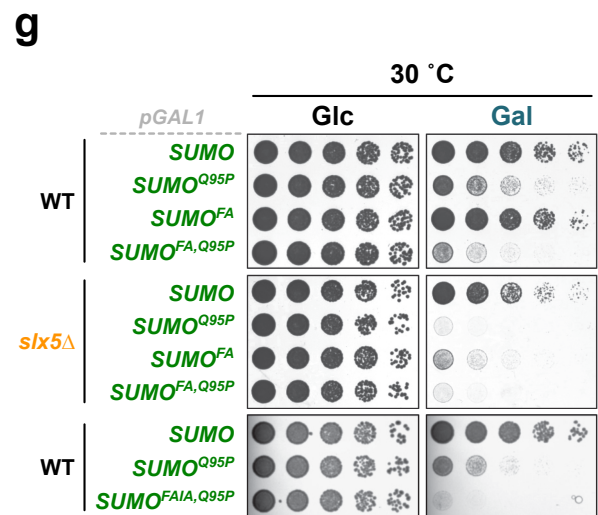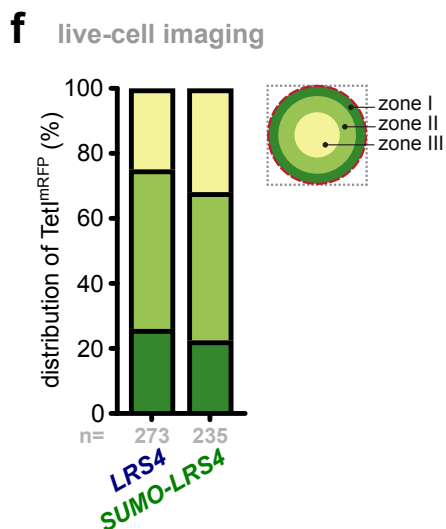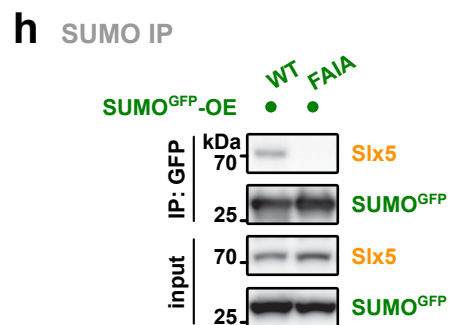

**Supplementary Fig. 5 SUMOylation of CLIP-cohibin members affects rDNA stability.**

**a**, Immunoprecipitation of Nur1<sup>3HA</sup> in WT, *sir2* $\Delta$  and *sir4* $\Delta$  expressing SUMO (endogenous promoter) or GFP-SUMO (*ADH1* promoter). Bands corresponding to Nur1 unmodified or monoSUMOylated are labeled. Dpm1 served as loading control. **b**, Immunoprecipitation of Nur1<sup>3HA</sup> in WT cells treated with nicotinamide (NAM) 5 mM for 2h. Bands corresponding to Nur1 unmodified or monoSUMOylated are labeled. Dpm1 served as loading control. **c**, Immunoprecipitation of Nur1<sup>3HA</sup> in *nur1* $\Delta$  cells transformed with plasmids bearing *NUR1* or the indicated mutants with the endogenous *NUR1* promoter. Bands corresponding to Nur1 unmodified or monoSUMOylated are labeled. Dpm1 served as loading control. **d**, Denaturing Ni-NTA pulldowns of <sup>6</sup>His-SUMO conjugates from *nur1* $\Delta$  cells transformed with plasmids bearing *NUR1* or the indicated mutants with the endogenous *NUR1* promoter. Pgk1 served as loading control. **e**, Rates of rDNA recombination in WT cells expressing Nur1 or the SUMOylation deficient mutant *nur1*KR with endogenous or increased levels of SUMO, grown in galactose-containing media (left; *n* = 4); and of strains expressing Nur1 fused to the SUMO-protease domain of Ulp1 (Nur1-UD) or the inactive version (Nur1-uD<sup>I</sup>), which carries the F474A and C580S mutations (right; *n* = 4). For SUMO overexpression, the different strains were transformed with empty vector or a plasmid bearing SUMO with the *GAL1* promoter. The rate of marker loss is calculated as the ratio of half-sectored colonies to the total number of colonies, excluding completely red colonies, shown in log<sub>2</sub> scale relative to WT (left) or Nur1-uD<sup>I</sup> (right); data are mean  $\pm$  SEM of *n* independent biological replicates. Statistical analysis was performed using analysis of variance (ANOVA), and different letters denote significant differences with a Tukey's *post hoc* test at *P*  $\leq$  0.05. **f**, Quantification of TetI<sup>mRFP</sup> location in *lrs4* $\Delta$  cells transformed with plasmids bearing TAP-tagged *LRS4* or *SUMO-LRS4* relative to Nup49<sup>marks</sup> (nuclear periphery marker), expressed in percentage of cells. *n* = number of cells counted in 4 biologically independent experiments (scored in strains from Fig. 5f). A scheme of a budding yeast nucleus divided in three zones with equal area is shown. These zones are called I-III depending on their proximity to the nuclear envelope. **g**, Five-fold serial dilutions of WT or *slx5* $\Delta$  cells transformed with plasmids bearing SUMO WT and the indicated SUMO variants with the galactose-inducible promoter *GAL1*. Cells were spotted and grown on selective media with glucose (control, Glc) or galactose (induction, Gal) at 30°C for 3 days. **h**, Co-immunoprecipitation of Slx5 with either GFP-tagged SUMO WT or a mutant unable to recognize SIMs (FAIA, which harbors the mutations F37A I39A). Source data are provided as a Source Data file.

**a** rDNA recombination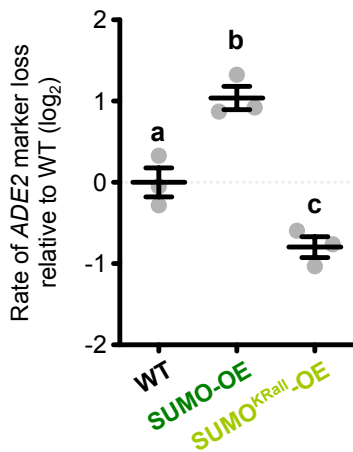**b** Lrs4 IP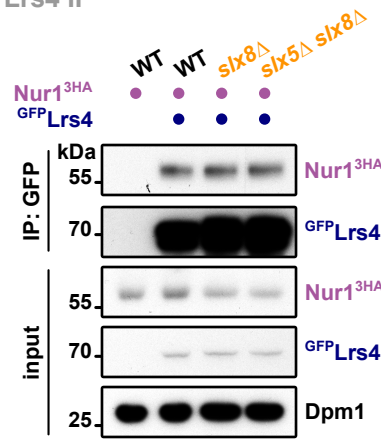**c** Lrs4 IP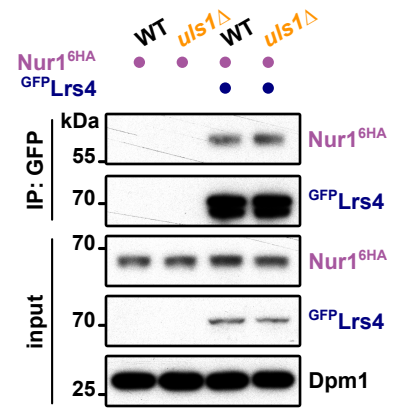**Supplementary Fig. 6 CLIP-cohibin interaction is not affected by the STUbLs**

**a**, Rates of rDNA recombination in WT cells expressing SUMO at endogenous levels or overexpressing either SUMO WT or a mutant unable to form SUMO chains from vectors with the *GAL1* promoter (SUMO-OE or SUMO<sup>KRall</sup>-OE, respectively), grown in galactose-containing media. The rate of marker loss is calculated as the ratio of half-sectored colonies to the total number of colonies, excluding completely red colonies, shown in log scale relative to WT; data are mean  $\pm$  SEM of  $n = 3$  biologically independent experiments. Statistical analysis was performed using analysis of variance (ANOVA), and different letters denote significant differences with a Tukey's *post hoc* test at  $P \leq 0.05$ . **b** and **c**, Co-immunoprecipitation of HA-tagged Nur1 with <sup>GFP</sup>Lrs4 in WT, *slx8*Δ, *slx5*Δ *slx8*Δ (**b**), or *uls1*Δ (**c**) cells, as indicated. Dpm1 served as loading control. Source data are provided as a Source Data file.

### a Nur1 phosphorylation

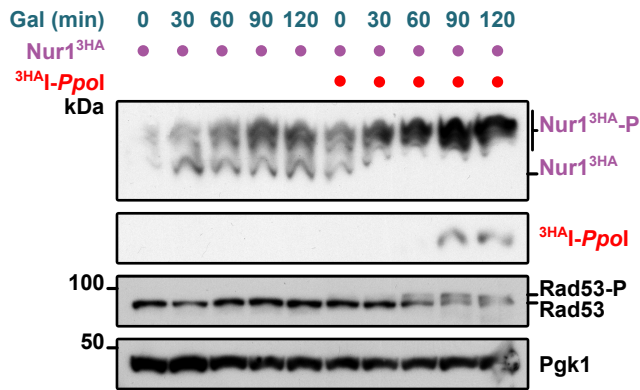

### b global SUMOylation

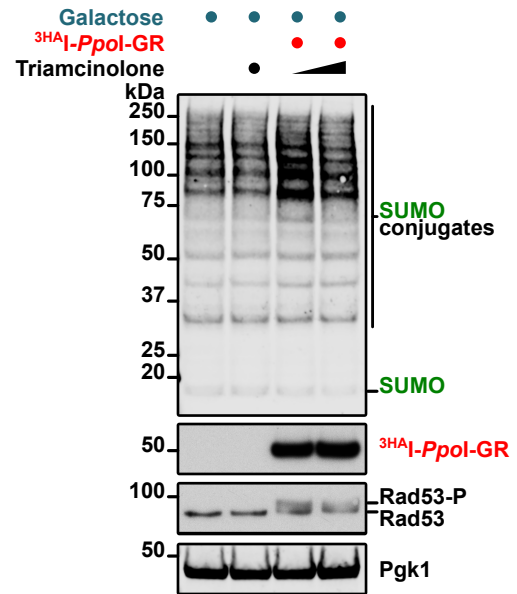

### c Rad52 foci formation

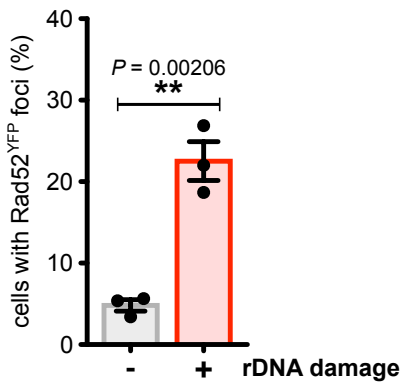

### d Rad52 co-localization

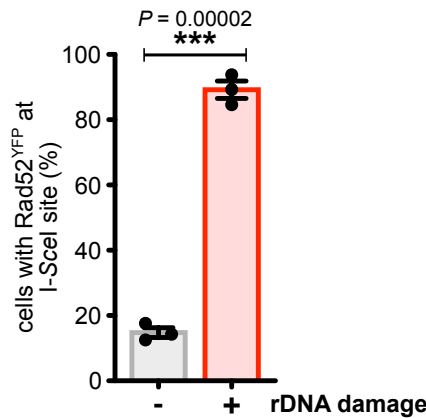

### Supplementary Fig. 7 Damage at rDNA promotes release of broken repeats.

**a**, Nur1<sup>3HA</sup> phosphorylation-dependent mobility shifts cells in cells with or without rDNA damage, analyzed using Phos-tag gels (note that molecular weight estimations using markers is not possible with Phos-tag gels). 3HA<sup>I</sup>-Ppol with the galactose-inducible promoters *GALL* were integrated at the *LEU2* locus. The different strains were grown to mid-log phase, and the endonuclease was induced by adding 2% galactose for indicated times. **b**, Immunoblot of SUMO conjugates upon rDNA damage. To ensure tight regulation of the endonuclease, I-Ppol was fused to the glucocorticoid receptor ligand-binding domain (3HA<sup>I</sup>-Ppol-GR) and expressed under the galactose-inducible promoter *GAL1* from a centromeric plasmid *YCplac22*. The strains were grown to mid-log phase, and the endonuclease was induced by adding 2% galactose for 3 h. Nuclear location of 3HA<sup>I</sup>-Ppol-GR was induced by addition of triamcinolone acetone 7.5  $\mu$ M and 75  $\mu$ M. **c**, Percentage of sites with active homologous recombination from WT cells, before (gray) and after (red) DSB induction. Active HR machinery was monitored by Rad52<sup>YFP</sup> foci formation, scored in strains from Fig. 7c. **d**, Percentage of cells with Rad52<sup>YFP</sup> colocalized with a marked rDNA repeat before (gray) and after (red) DNA damage (I-SceI site) in WT cells. For **a** and **b**, Rad53 phosphorylation served as a marker for DNA damage, while Pgk1 served as loading control. For **c** and **d**, the mean  $\pm$  SEM of  $n = 3$  independent biological replicates is shown. Statistical analysis was performed using two-tailed Student's t-test, and significant differences are denoted \*\* ( $P \leq 0.005$ ) and \*\*\* ( $P \leq 0.001$ ). Source data are provided as a Source Data file.

**Supplementary Table 1. Yeast strains used in this study**

| Genotype                                                                                                                                            | Source               | Identifier |
|-----------------------------------------------------------------------------------------------------------------------------------------------------|----------------------|------------|
| <i>trp1-1 ura3-52 his3Δ200 leu2-3,11 lys2-801</i>                                                                                                   | Finley et al., 1987  | DF5        |
| DF5, MATα HEH1-L <sup>EGFP</sup> ::HIS3MX6                                                                                                          | Capella et al., 2020 | MC0064     |
| DF5, MATα HEH1-L <sup>EGFP</sup> ::HIS3MX6 <i>nur1Δ::kanMX6</i>                                                                                     | This study           | MC0479     |
| DF5, MATα HEH1-L <sup>EGFP</sup> ::HIS3MX6 CSM1 <sup>TAP</sup> :: <i>kanMX6</i>                                                                     | This study           | MC0659     |
| DF5, MATα HEH1-L <sup>EGFP</sup> ::HIS3MX6 <i>nur1Δ::kanMX6</i><br>CSM1 <sup>TAP</sup> :: <i>kanMX6</i>                                             | This study           | MC0184     |
| DF5, MATα LRS4 <sup>3HA</sup> ::KITRP1                                                                                                              | This study           | MC0628     |
| DF5, MATα LRS4 <sup>3HA</sup> ::KITRP1 <i>nur1Δ::kanMX6</i>                                                                                         | This study           | MC0682     |
| DF5, MATα LRS4 <sup>3HA</sup> ::KITRP1 <i>natNT2::pHEH1::GFP HEH1</i>                                                                               | This study           | MC0656     |
| DF5, MATα LRS4 <sup>3HA</sup> ::KITRP1 <i>natNT2::pHEH1::GFP HEH1</i><br><i>nur1Δ::kanMX6</i>                                                       | This study           | MC0690     |
| DF5, MATα <i>natNT2::pMET25::yeGFP LRS4</i>                                                                                                         | This study           | MC0073     |
| DF5, MATα <i>natNT2::pMET25::yeGFP LRS4 csm1Δ::hphNT1</i>                                                                                           | This study           | MC0089     |
| DF5, MATα <i>natNT2::pMET25::yeGFP LRS4 NUR1<sup>3HA</sup>::KITRP1</i>                                                                              | This study           | MC0644     |
| DF5, MATα <i>natNT2::pMET25::yeGFP LRS4 csm1Δ::hphNT1</i><br><i>NUR1<sup>3HA</sup>::KITRP1</i>                                                      | This study           | MC0090     |
| DF5, MATα <i>natNT2::pMET25::yeGFP LRS4 nur1Δ54<sup>3HA</sup> (1-430aa)::KITRP1</i>                                                                 | This study           | MC0607     |
| DF5, MATα <i>natNT2::pMET25::yeGFP LRS4 nur1ΔC<sup>3HA</sup> (1-295aa)::KITRP1</i>                                                                  | This study           | MC0319     |
| DF5, MATα CSM1 <sup>TAP</sup> :: <i>kanMX6</i>                                                                                                      | This study           | MC0629     |
| DF5, MATα HEH1-L <sup>EGFP</sup> ::HIS3MX6 CSM1 <sup>TAP</sup> :: <i>kanMX6</i><br><i>lrs4Δ::hphNT1</i>                                             | This study           | MC0761     |
| DF5, MATα HEH1-L <sup>EGFP</sup> <i>NUR1<sup>3HA</sup>::KITRP1</i>                                                                                  | This study           | MC0660     |
| DF5, MATα HEH1-L <sup>EGFP</sup> <i>nur1Δ54<sup>3HA</sup> (1-430aa)::KITRP1</i>                                                                     | This study           | MC0606     |
| DF5, MATα HEH1-L <sup>EGFP</sup> <i>nur1ΔC<sup>3HA</sup> (1-295aa)::KITRP1</i>                                                                      | This study           | MC0318     |
| DF5, MATα NET1::AIDx4 <sup>9Myc</sup> ::HIS3MX6 URA3::pADH1::OsTIR1 <sup>9Myc</sup><br><i>Nur1<sup>3HA</sup>::KITRP1</i>                            | This study           | MC0731     |
| DF5, MATα NET1::AIDx4 <sup>9Myc</sup> ::HIS3MX6 URA3::pADH1::OsTIR1 <sup>9Myc</sup><br><i>Nur1<sup>3HA</sup>::KITRP1 natNT2::pMET25::yeGFP LRS4</i> | This study           | MC0996     |
| DF5, MATα <i>NUR1<sup>3HA</sup>::KITRP1</i>                                                                                                         | This study           | MC0630     |
| DF5, MATα HEH1-L <sup>EGFP</sup> <i>NUR1<sup>3HA</sup>::KITRP1 lrs4Δ::hphNT1</i>                                                                    | This study           | MC0760     |
| DF5, MATα <i>NUR1<sup>3HA</sup>::KITRP1 URA3::pADH1::6His SMT3</i>                                                                                  | This study           | MC0723     |
| DF5, MATα HEH1-L <sup>EGFP</sup> <i>NUR1<sup>3HA</sup>::KITRP1 URA3::pADH1::6His SMT3</i>                                                           | This study           | MC0724     |
| DF5, MATα <i>natNT2::pMET25::yeGFP LRS4 NUR1<sup>3HA</sup>::KITRP1</i><br><i>URA3::pADH1::6His SMT3</i>                                             | This study           | MC0650     |
| DF5, MATα <i>NUR1<sup>3HA</sup>::KITRP1 natNT2::pADH1::yeGFP SMT3</i>                                                                               | This study           | MC0076     |
| DF5, MATα <i>NUR1<sup>3HA</sup>::KITRP1 siz1Δ::HIS3MX6</i>                                                                                          | This study           | MC0473     |
| DF5, MATα <i>NUR1<sup>3HA</sup>::KITRP1 natNT2::pADH1::yeGFP SMT3</i><br><i>siz1Δ::HIS3MX6</i>                                                      | This study           | MC0474     |
| DF5, MATα <i>NUR1<sup>3HA</sup>::KITRP1 siz2Δ::HIS3MX6</i>                                                                                          | This study           | MC0475     |
| DF5, MATα <i>NUR1<sup>3HA</sup>::KITRP1 natNT2::pADH1::yeGFP SMT3</i><br><i>siz2Δ::HIS3MX6</i>                                                      | This study           | MC0476     |
| DF5, MATα <i>NUR1<sup>3HA</sup>::KITRP1 sir2Δ::HIS3MX6</i>                                                                                          | This study           | MC0245     |
| DF5, MATα <i>NUR1<sup>3HA</sup>::KITRP1 natNT2::pADH1::yeGFP SMT3</i><br><i>sir2Δ::HIS3MX6</i>                                                      | This study           | MC0246     |
| DF5, MATα <i>NUR1<sup>3HA</sup>::KITRP1 sir4Δ::hphNT1</i>                                                                                           | This study           | MC0811     |

|                                                                                                                                                                                                                              |                            |             |
|------------------------------------------------------------------------------------------------------------------------------------------------------------------------------------------------------------------------------|----------------------------|-------------|
| DF5, MATa NUR1 <sup>3HA</sup> ::KITRP1 natNT2::pADH1::yeGFP SMT3 sir4Δ::hphNT1                                                                                                                                               | This study                 | MC0812      |
| DF5, MATa nur1Δ::kanMX6                                                                                                                                                                                                      | This study                 | MC0634      |
| DF5, MATa nur1Δ::kanMX6 natNT2::pADH1::yeGFP SMT3                                                                                                                                                                            | This study                 | MC0077      |
| DF5, MATα URA3::pADH1:: <sup>6His</sup> SMT3                                                                                                                                                                                 | Paasch et al., 2018        | MC0435      |
| DF5, MATα heh1Δ::natNT2                                                                                                                                                                                                      | Capella et al., 2020       | MC0026      |
| DF5, MATα lrs4Δ::hphNT1                                                                                                                                                                                                      | This study                 | MC0429      |
| DF5, MATa CSM1 <sup>TAP</sup> ::kanMX6 heh1Δ::natNT2                                                                                                                                                                         | This study                 | MC0692      |
| DF5, MATa CSM1 <sup>TAP</sup> ::kanMX6 URA3::pADH1:: <sup>6His</sup> SMT3                                                                                                                                                    | This study                 | MC0733      |
| DF5, MATα TOF2 <sup>TAP</sup> ::kanMX6                                                                                                                                                                                       | This study                 | MC0066      |
| DF5, MATa natNT2::pMET25::yeGFP LRS4 NUR1 <sup>3HA</sup> ::KITRP1 slx8Δ::hphNT1                                                                                                                                              | This study                 | MC0377      |
| DF5, MATa natNT2::pMET25::yeGFP LRS4 NUR1 <sup>3HA</sup> ::KITRP1 slx5Δ::HIS3MX6 slx8Δ::hphNT1                                                                                                                               | This study                 | MC0378      |
| MATa ADE2 RAD52 <sup>YFP</sup> RDN25::224xtetO-URA3-I-SceI TetI <sup>mRFP1</sup> -iYGL119W                                                                                                                                   | Torres-Rosell et al., 2007 | ML118-1D    |
| ML118-1D, MATa NUR1 <sup>6HA</sup> ::HIS3MX6                                                                                                                                                                                 | This study                 | MC0857      |
| ML118-1D, MATa nur1 K175-176R <sup>6HA</sup> (1-430aa)::HIS3MX6                                                                                                                                                              | This study                 | MC0858      |
| ML118-1D, MATa nur1Δ54 <sup>6HA</sup> (1-430aa)::HIS3MX6                                                                                                                                                                     | This study                 | MC0859      |
| ML118-1D, MATa nur1ΔC <sup>6HA</sup> (1-295aa)::HIS3MX6                                                                                                                                                                      | This study                 | MC0860      |
| ML118-1D, MATa nur1Δ::kanMX6                                                                                                                                                                                                 | This study                 | MC0678      |
| ML118-1D, MATa SMT3::kanMX6::pADH1:: <sup>6His</sup> SMT3                                                                                                                                                                    | This study                 | MC0370      |
| ML118-1D, MATa ufd1ΔSIM (1-355aa)::kanMX6                                                                                                                                                                                    | This study                 | MC0079      |
| ML118-1D, MATa NUP49 <sup>mars</sup> ::hphNT1 lrs4Δ::natNT2                                                                                                                                                                  | This study                 | MC1048      |
| trp-901-, leu2-3,112 ura3-53 his3-200 gal4Δ gal80Δ GAL1::HIS GAL2-ADE2 met2::GAL7-lacZ                                                                                                                                       | James et al., 1996         | PJ69-7a     |
| MATα ura3-52 his3-200 trp1-901 leu2-3,112 ade2-101 gal4Δ met-gal80Δ URA3::GAL1 <sub>UAS</sub> -GAL1 <sub>TATA</sub> ::LacZ MEL1                                                                                              | Clontech®                  | Y187        |
| MATa ura3-52 his3-200 trp1-901 leu2-3,112 gal4Δ gal80Δ LYS2::GAL1 <sub>UAS</sub> -GAL1 <sub>TATA</sub> ::HIS3 GAL2 <sub>UAS</sub> -GAL2 <sub>TATA</sub> ::ADE2 URA3::MEL1 <sub>UAS</sub> -MEL1 <sub>TATA</sub> ::AUR1-C MEL1 | Clontech®                  | Y2H Gold    |
| ade2-1 can1-100 his3-11,15 leu2-3,112 trp1-1 ura3-1 RAD5                                                                                                                                                                     | McDonald et al., 1997      | W303 (RAD5) |
| W303, MATα natNT2::pMET25::yeGFP LRS4                                                                                                                                                                                        | This study                 | MC0727      |
| W303, MATα NET1 <sup>EGFP</sup> ::HIS3MX6                                                                                                                                                                                    | This study                 | MC0836      |
| W303, MATα TOF2 <sup>EGFP</sup> ::HIS3MX6                                                                                                                                                                                    | This study                 | MC0837      |
| W303, MATa NUR1 <sup>6HA</sup> ::HIS3MX6                                                                                                                                                                                     | This study                 | MC0566      |
| W303, MATa NUR1 <sup>6HA</sup> ::HIS3MX6 natNT2::pMET25::yeGFP LRS4                                                                                                                                                          | This study                 | MC0848      |
| W303, MATα NUR1 <sup>6HA</sup> ::HIS3MX6 natNT2::pMET25::yeGFP LRS4 cdc14-3                                                                                                                                                  | This study                 | MC0938      |
| W303, MATa NUR1 <sup>6HA</sup> ::HIS3MX6 natNT2::pMET25::yeGFP LRS4 cdc14-3                                                                                                                                                  | This study                 | MC0939      |
| W303, MATa NUR1 <sup>6HA</sup> ::HIS3MX6 natNT2::pMET25::yeGFP LRS4 ufd1-2::kanMX6                                                                                                                                           | This study                 | MC0462      |
| W303, MATa NUR1 <sup>6HA</sup> ::HIS3MX6 natNT2::pMET25::yeGFP LRS4 ufd1ΔSIM (1-355aa)::kanMX6                                                                                                                               | This study                 | MC0478      |
| W303, MATa NUR1 <sup>6HA</sup> ::HIS3MX6 uls1Δ::kanMX6                                                                                                                                                                       | This study                 | MC0117      |
| W303, MATa NUR1 <sup>6HA</sup> ::HIS3MX6 natNT2::pMET25::yeGFP LRS4 uls1Δ::kanMX6                                                                                                                                            | This study                 | MC0119      |
| W303, MATa HEH1 <sup>EGFP</sup> ::HIS3MX6                                                                                                                                                                                    | This study                 | MC0947      |
| W303, MATa HEH1 <sup>EGFP</sup> ::HIS3MX6 LRS4 <sup>TAP</sup> ::kanMX6                                                                                                                                                       | This study                 | MC0948      |

|                                                                                                                                                     |            |        |
|-----------------------------------------------------------------------------------------------------------------------------------------------------|------------|--------|
| W303, MATa HEH1 <sup>EGFP</sup> ::HIS3MX6 LRS4 <sup>TAP</sup> ::kanMX6<br>ChrIII <sub>92.5kb</sub> ::natNT2::pGALL::3 <sup>HA</sup> SV40 NLS-I-PPOI | This study | MC0991 |
| W303, MATa HEH1 <sup>EGFP</sup> ::HIS3MX6 LRS4 <sup>TAP</sup> ::kanMX6<br>ChrIII <sub>92.5kb</sub> ::natNT2::pGAL1::3 <sup>HA</sup> SV40 NLS-I-PPOI | This study | MC0992 |
| W303, MATa NUR1 <sup>6HA</sup> ::HIS3MX6 URA3::pGAL1::CDC48::ADHt                                                                                   | This study | MC0163 |
| W303, MATa natNT2::pMET25::ye <sup>GFP</sup> LRS4<br>URA3::pGAL1::CDC48::ADHt                                                                       | This study | MC0164 |
| W303, MATa NUR1 <sup>6HA</sup> ::HIS3MX6 natNT2::pMET25::ye <sup>GFP</sup> LRS4<br>URA3::pGAL1::CDC48::ADHt                                         | This study | MC0165 |
| W303, MATa NUR1 <sup>6HA</sup> ::HIS3MX6 natNT2::pMET25::ye <sup>GFP</sup> LRS4<br>URA3::pGAL1::cdc48-6::ADHt                                       | This study | MC0168 |
| W303, MATa NUR1 <sup>6HA</sup> ::HIS3MX6 natNT2::pMET25::ye <sup>GFP</sup> LRS4<br>URA3::pGAL1::cdc48 E588Q::ADHt                                   | This study | MC0167 |
| W303, MATa CDC14 <sup>TAP</sup> ::kanMX6                                                                                                            | This study | MC0549 |
| W303, MATa RDN1::ADE2                                                                                                                               | This study | MC0717 |
| W303, MATa RDN1::ADE2 nur1Δ::kanMX6                                                                                                                 | This study | MC0669 |
| W303, MATα RDN1::ADE2 csm1Δ::HIS3MX6                                                                                                                | This study | MC0953 |
| W303, MATa RDN1::ADE2 uaf30Δ::kanMX6                                                                                                                | This study | MC1005 |
| W303, MATα RDN1::ADE2 uaf30Δ::kanMX6 csm1Δ::HIS3MX6                                                                                                 | This study | MC1050 |
| W303, MATa RDN1::ADE2 uaf30Δ::kanMX6 nur1Δ::kanMX6                                                                                                  | This study | MC1029 |
| W303, MATa RDN1::ADE2 lrs4Δ::hphNT1                                                                                                                 | This study | MC0641 |
| W303, MATα RDN1::ADE2 ULP2 <sup>6HA</sup> ::HIS3MX6                                                                                                 | This study | MC0982 |
| W303, MATα RDN1::ADE2 ulp2ΔC <sup>6HA</sup> (1-781aa)::HIS3MX6                                                                                      | This study | MC0983 |
| W303, MATa RDN1::ADE2 NUR1 <sup>6HA</sup> -ULP1-CD::HIS3MX6                                                                                         | This study | MC1032 |
| W303, MATa RDN1::ADE2 NUR1 <sup>6HA</sup> -ulp1-CDi F474A<br>C580S::HIS3MX6                                                                         | This study | MC1033 |
| W303, MATa RDN1::ADE2 NUR1 <sup>3HA</sup> ::KITRP1                                                                                                  | This study | MC0622 |
| W303, MATa RDN1::ADE2 nur1 K175-176R <sup>3HA</sup> ::KITRP1                                                                                        | This study | MC0623 |
| W303, MATa RDN1::ADE2 NUR1 <sup>3HA</sup> ::KITRP1 rad52Δ::HIS3MX6                                                                                  | This study | MC0743 |
| W303, MATa RDN1::ADE2 nur1 K175-176R <sup>3HA</sup> ::KITRP1<br>rad52Δ::HIS3MX6                                                                     | This study | MC0744 |
| W303, MATa RDN1::ADE2 NUR1 <sup>6HA</sup> ::HIS3MX6                                                                                                 | This study | MC0878 |
| W303, MATa RDN1::ADE2 nur1 K175-176R <sup>6HA</sup> ::HIS3MX6                                                                                       | This study | MC0879 |
| W303, MATa RDN1::ADE2 NUR1 <sup>6HA</sup> ::HIS3MX6 lrs4Δ::hphNT1                                                                                   | This study | MC0880 |
| W303, MATa RDN1::ADE2 nur1 K175-176R <sup>6HA</sup> ::HIS3MX6<br>lrs4Δ::hphNT1                                                                      | This study | MC0881 |
| W303, MATa RDN1::ADE2 ufd1ΔSIM (1-355aa)::kanMX6                                                                                                    | This study | MC0160 |
| W303, MATa RDN1::ADE2 ufd1ΔSIM (1-355aa)::kanMX6<br>lrs4Δ::hphNT1                                                                                   | This study | MC0161 |
| W303, MATa RDN1::ADE2 ufd1ΔSIM (1-355aa)::kanMX6<br>nur1Δ::natNT2                                                                                   | This study | MC0994 |
| W303, MATa RDN1::ADE2 ctf4Δ::natNT2                                                                                                                 | This study | MC0773 |
| W303, MATa RDN1::ADE2 ctf4Δ::natNT2 ufd1ΔSIM (1-<br>355aa)::kanMX6                                                                                  | This study | MC0774 |
| W303, MATa RDN1::ADE2 rrm3Δ::natNT2                                                                                                                 | This study | MC0771 |
| W303, MATa RDN1::ADE2 rrm3Δ::natNT2 ufd1ΔSIM (1-<br>355aa)::kanMX6                                                                                  | This study | MC0772 |
| W303, MATa RDN1::ADE2 NUR1 <sup>6HA</sup> ::HIS3MX6 ctf4Δ::natNT2                                                                                   | This study | MC1001 |

W303, MATa RDN1::ADE2 *nur1* K175-176R<sup>6HA</sup>::HIS3MX6  
*ctf4Δ::natNT2*

This study

MC1002

## Supplementary Table 2. Plasmids used in this study.

Point mutations refer to the position of the aminoacid/s (aa) in WT proteins. The specific positions of the truncated constructs are indicated in brackets.

| Construct                                                 | Source               | Identifier |
|-----------------------------------------------------------|----------------------|------------|
| YCplac22                                                  | Gietz and Akio, 1988 | pMC_0111   |
| YCplac22 pGAL1::HEH1-L-6HA::ADH1t                         | This study           | pMC_0459   |
| YCplac22 pGAL1::HEH1-L-3HA-GBP::ADH1t                     | This study           | pMC_0442   |
| YCplac22 pGALS::HEH1-L-6HA::ADH1t                         | This study           | pMC_0461   |
| YCplac22 pGALS::HEH1-L-3HA-GBP::ADH1t                     | This study           | pMC_0463   |
| YCplac22 pNOP1::NOP1-ECFP                                 | This study           | pMC_0480   |
| YCplac22 pGAL1::NUR1::ADH1t                               | This study           | pMC_0595   |
| YCplac22 pGAL1::nur1 S441D T446D S449D::ADH1t             | This study           | pMC_0599   |
| YCplac22 pGAL1::nur1 S441A T446A S449A::ADH1t             | This study           | pMC_0600   |
| YCplac111                                                 | Gietz and Akio, 1988 | pMC_0110   |
| YCplac111 pGAL1::yeGFP-HEH1-L::ADH1t                      | Capella et al., 2020 | pMC_0395   |
| YCplac111 pGAL1::yeGFP-LRS4::ADH1t                        | This study           | pMC_0631   |
| YCplac111 pGAL1::yeGFP-HEH1-L-LRS4::ADH1t                 | This study           | pMC_0443   |
| YCplac111 pGAL1::yeGFP-HEH1-L-lrs4 $\Delta$ 1-35aa::ADH1t | This study           | pMC_0444   |
| YCplac111 pGAL1::yeGFP-HEH1-L-lrs4 Q325Stop::ADH1t        | This study           | pMC_0445   |
| YCplac111 pGAL1::yeGFP-HEH1-L-TOF2::ADH1t                 | This study           | pMC_0446   |
| YCplac111 pGAL1::yeGFP-HEH1-L-GAL4-BD::ADH1t              | This study           | pMC_0447   |
| YCplac111 pGALS::yeGFP-HEH1-L-LRS4::ADH1t                 | This study           | pMC_0464   |
| YCplac111 pGALS::yeGFP-HEH1-L-LRS4::ADH1t                 | This study           | pMC_0448   |
| YCplac111 pGALS::yeGFP-HEH1-L-lrs4 Q325Stop::ADH1t        | This study           | pMC_0465   |
| YCplac111 pNUR1::NUR1::ADH1t                              | This study           | pMC_0565   |
| YCplac111 pNUR1::nur1 S441D T446D S449D::ADH1t            | This study           | pMC_0570   |
| YCplac111 pNUR1::NUR1-TAP::ADH1t                          | This study           | pMC_0565   |
| YCplac111 pNUR1::nur1 S441D T446D S449D-TAP::ADH1t        | This study           | pMC_0570   |
| YCplac111 pNUR1::NUR1-3HA                                 | This study           | pMC_0545   |
| YCplac111 pNUR1::nur1 K175-176R-3HA                       | This study           | pMC_0546   |
| YCplac111 pNUR1::nur1 K306R-3HA                           | This study           | pMC_0547   |
| YCplac111 pNUR1::nur1 K353R-3HA                           | This study           | pMC_0548   |
| YCplac111 pNUR1::nur1 K465R-3HA                           | This study           | pMC_0549   |
| YCplac111 pNUR1::nur1 K477R-3HA                           | This study           | pMC_0550   |
| YCplac111 pNUR1::smt3 Q95P-NUR1-3HA                       | This study           | pMC_0555   |
| YCplac111 pNUR1::smt3 F37A I39A Q95P-NUR1-3HA             | This study           | pMC_0556   |
| YCplac111 pLRS4::LRS4-TAP::ADH1t                          | This study           | pMC_0637   |
| YCplac111 pLRS4::smt3 Q95P-LRS4-TAP::ADH1t                | This study           | pMC_0638   |
| YCplac111 pLRS4::smt3 F37A I39A Q95P-LRS4-TAP::ADH1t      | This study           | pMC_0639   |
| YCplac111 pNUR1::NUR1-3HA                                 | This study           | pMC_0545   |
| YCplac111 pNUR1::smt3 Q95P-NUR1-3HA                       | This study           | pMC_0555   |
| YCplac111 pNUR1::smt3 F37A I39A Q95P-NUR1-3HA             | This study           | pMC_0546   |
| YCplac111 pGAL1::2xSV40 NLS-HA-I-SceI::ADH1t              | This study           | pMC_0298   |
| pRS415 pGAL1                                              | Mumberg et al., 1995 | pMC_0147   |
| pRS415 pGAL1::3HA-I-Ppol-GR-LBD::CYC1t                    | This study           | pMC_0320   |

|                                                         |                      |          |
|---------------------------------------------------------|----------------------|----------|
| <i>pRS415 pTEF1</i>                                     | This study           | pMC_0485 |
| <i>pRS415 pTEF1::SMT3 GG::CYC1t</i>                     | This study           | pMC_0486 |
| <i>pCu415 pGAL1::SMT3 GG::CYC1t</i>                     | This study           | pFA_196  |
| <i>pCu415 pGAL1::smt3 Q95P GG::CYC1t</i>                | This study           | pFA_261  |
| <i>pCu415 pGAL1::smt3 F37A GG::CYC1t</i>                | This study           | pFA_264  |
| <i>pCu415 pGAL1::smt3 F37A Q95P GG::CYC1t</i>           | This study           | pFA_265  |
| <i>pCu415 pGAL1::smt3 F37A I39A GG::CYC1t</i>           | This study           | pFA_335  |
| <i>pCu415 pGAL1::smt3 F37A I39A Q95P GG::CYC1t</i>      | This study           | pFA_336  |
| <i>pCu426 pGAL1::smt3 Q95P GG::GFP::CYC1t</i>           | This study           | pFA_668  |
| <i>pCu426 pGAL1::smt3 F37A I39A Q95P GG::GFP::CYC1t</i> | This study           | pFA_669  |
| <i>pCu415 pGAL1::smt3 KRaII GG::CYC1t</i>               | This study           | pFA_321  |
| <i>pGBKT7</i>                                           | Clontech®            | pMC_0385 |
| <i>pGBKT7 CSM1</i>                                      | This study           | pMC_0477 |
| <i>pGBKT7 LRS4</i>                                      | This study           | pMC_0479 |
| <i>pGBKT7 CDC14</i>                                     | This study           | pMC_0658 |
| <i>pGBKT7 SMT3 AA</i>                                   | This study           | pMC_0273 |
| <i>pGBKT7 smt3 F37A I39A AA</i>                         | This study           | pMC_0275 |
| <i>pGADT7</i>                                           | Clontech®            | pMC_0386 |
| <i>pGADT7 HEH1 N (1-454aa)</i>                          | Capella et al., 2020 | pMC_0354 |
| <i>pGADT7 HEH1 C (730-834aa)</i>                        | Capella et al., 2020 | pMC_0355 |
| <i>pGADT7 NUR1 N (1-60aa)</i>                           | This study           | pMC_0505 |
| <i>pGADT7 NUR1 M (167-240aa)</i>                        | This study           | pMC_0507 |
| <i>pGADT7 NUR1 C (278-484aa)</i>                        | This study           | pMC_0504 |
| <i>pGADT7 NUR1 278-332 (278-332aa)</i>                  | This study           | pMC_0524 |
| <i>pGADT7 NUR1 278-430 (278-430aa)</i>                  | This study           | pMC_0523 |
| <i>pGADT7 NUR1 333-484 (333-484aa)</i>                  | This study           | pMC_0525 |
| <i>pGADT7 NUR1 431-484 (431-484aa)</i>                  | This study           | pMC_0527 |
| <i>pGADT7 NUR1 333-430 (333-430aa)</i>                  | This study           | pMC_0526 |
| <i>pGADT7 NUR1 S441D T446D (278-484aa)</i>              | This study           | pMC_0529 |
| <i>pGADT7 NUR1 S439D S441D T446D (278-484aa)</i>        | This study           | pMC_0535 |
| <i>pGADT7 NUR1 S441D T446D S449D (278-484aa)</i>        | This study           | pMC_0537 |
| <i>pGADT7 NUR1 S439D S441D T446D S449D (278-484aa)</i>  | This study           | pMC_0539 |
| <i>pGADT7 NUR1 S441A T446A (278-484aa)</i>              | This study           | pMC_0530 |
| <i>pGADT7 NUR1 S439A S441A T446A (278-484aa)</i>        | This study           | pMC_0536 |
| <i>pGADT7 NUR1 S441A T446A S449A (278-484aa)</i>        | This study           | pMC_0538 |
| <i>pGADT7 NUR1 S439A S441A T446A S449A (278-484aa)</i>  | This study           | pMC_0540 |
| <i>pGADT7 SMT3 GG</i>                                   | This study           | pMC_0276 |
| <i>pGADT7 SMT3 AA</i>                                   | This study           | pMC_0277 |
| <i>pGADT7 CDC48</i>                                     | This study           | pMC_0470 |
| <i>pGADT7 NPL4</i>                                      | This study           | pMC_0472 |
| <i>pGADT7 UFD1</i>                                      | This study           | pMC_0473 |
| <i>pGADT7 ufd1ΔSIM (1-355aa)</i>                        | This study           | pMC_0474 |

**Supplementary Table 3. Set of primers used in this study for qPCR or ChIP experiments.**

| <b>Primers</b> | <b>Region/Locus</b> | <b>Sequence</b>                | <b>Use</b>                                             |
|----------------|---------------------|--------------------------------|--------------------------------------------------------|
| MC_636         | ACT1 For            | GGATTCTGGTATGTTCTAGCGCTTGCACCA | RT-qPCR and genomic DNA normalization                  |
| MC_637         | ACT1 Rev            | AATCTCTCGAGCAATTGGGACCGTGCA    | RT-qPCR and genomic DNA normalization                  |
| MC_545         | I-Ppol cut site For | TGTTGACGCAATGTGATTTCTGCCC      | Genomic qPCR (DSB efficiency)                          |
| MC_546         | I-Ppol cut site Rev | GTAGATAGGGACAGTGGGAATCTCG      | Genomic qPCR (DSB efficiency)                          |
| MC_699         | RDN1 #9 For         | CTAGCGAAACCACAGCCAAG           | ChIP normalization and control                         |
| MC_700         | RDN1 #9 Rev         | AATGTCTTCAACCCGGATCA           | ChIP normalization and control                         |
| MC_701         | RDN1 #12 For        | TAATTGGTTTTTGCGGCTGT           | ChIP normalization and RT-qPCR (control)               |
| MC_702         | RDN1 #12 Rev        | ATGATTTATCCCCACGCAAA           | ChIP normalization and RT-qPCR (control)               |
| MC_387         | RDN1 #15.1 For      | TCACAAAGCTTCCCAGCGTG           | ChIP (binding site) and RT-qPCR (NTS1)                 |
| MC_388         | RDN1 #15.1 Rev      | TCATATCAAAGGCATGTCCTG          | ChIP (binding site) and RT-qPCR (NTS1)                 |
| MC_393         | RDN1 #23 For        | GGGAGGTACTTCATGCGAAA           | RT-qPCR (NTS2)                                         |
| MC_394         | RDN1 #23 Rev        | AAGATGCCCACGATGAGACT           | RT-qPCR (NTS2)                                         |
| MC_711         | RDN1 #25 For        | GGCAGCAGAGAGACCTGAAA           | ChIP normalization and genomic qPCR (rDNA copy number) |
| MC_712         | RDN1 #25 Rev        | GAGCCATTGCGAGTTTCACT           | ChIP normalization and genomic qPCR (rDNA copy number) |

## References:

- Finley, D., Özkaynak, E. & Varshavsky, A. The yeast polyubiquitin gene is essential for resistance to high temperatures, starvation, and other stresses. *Cell* **48**, 1035–1046 (1987).
- Capella, M., Martín Caballero, L., Pfander, B., Braun, S. & Jentsch, S. ESCRT recruitment by the *S. cerevisiae* inner nuclear membrane protein Heh1 is regulated by Hub1-mediated alternative splicing. *J. Cell Sci.* **133**, jcs250688 (2020).
- Paasch, F., Den Brave, F., Psakhye, I., Pfander, B. & Jentsch, S. Failed mitochondrial import and impaired proteostasis trigger SUMOylation of mitochondrial proteins. *J. Biol. Chem.* **293**, 599–609 (2018).
- Torres-Rosell, J. *et al.* The Smc5-Smc6 complex and SUMO modification of Rad52 regulates recombinational repair at the ribosomal gene locus. *Nat. Cell Biol.* **9**, 923–931 (2007).
- James, P., Halladay, J. & Craig, E. A. Genomic Libraries and a Host Strain Designed for Highly Efficient Two-Hybrid Selection in Yeast. *Genetics* **144**, 1425–1436 (1996).
- McDonald, J. P., Levine, A. S. & Woodgate, R. The *Saccharomyces cerevisiae* RAD30 gene, a homologue of *Escherichia coli* dinB and umuC, is DNA damage inducible and functions in a novel error-free postreplication repair mechanism. *Genetics* **147**, 1557–1568 (1997).
- Gietz, R. D. & Akio, S. New yeast-*Escherichia coli* shuttle vectors constructed with in vitro mutagenized yeast genes lacking six-base pair restriction sites. *Gene* **74**, 527–534 (1988).
- Mumberg, D., Müller, R. & Funk, M. Yeast vectors for the controlled expression of heterologous proteins in different genetic backgrounds. *Gene* **156**, 119–122 (1995).
